# Supplementary material for: The distribution and host range of the banana Fusarium wilt fungus, Fusarium oxysporum f. sp. cubense, in Asia
Source: PLoS One. 2017 Jul 18;12(7):e0181630. doi: 10.1371/journal.pone.0181630 (PMC5515439; doi:10.1371/journal.pone.0181630)
Supplement: S1 Table — (XLSX) [file pone.0181630.s001.xlsx]

## Sheet: S1 Table
CAV number	Species	Forma speciales	Clade	Lineage	VCG	Provided by	Cultivar	Cultivar subgroup	Location	Country
1674	Fusarium oxysporum	cubense	A	V	01213	Ivan Buddenhagen	No information provided	/	Bogol, Java	Indonesia
1677	Fusarium oxysporum	cubense	A	V	01213	Ivan Buddenhagen	No information provided	/	Bogol, Java	Indonesia
1678	Fusarium oxysporum	cubense	B	VII	0123	G. Molina	Latundan	Silk (AAB)	Carmen, Davao Del Norte	Philippines
1679	Fusarium oxysporum	cubense	A	V	01216	G. Molina	Grande Naine	Cavendish (AAA)	Baguio, Davao City	Philippines
1680	Fusarium oxysporum	cubense	A	V	01213/16	G. Molina	Grande Naine	Cavendish (AAA)	Baguio, Davao City	Philippines
1681	Fusarium oxysporum	cubense	A	V	01213/16	G. Molina	Grande Naine	Cavendish (AAA)	Buhangin, Davao City	Philippines
1682	Fusarium oxysporum	cubense	A	V	01213/16	G. Molina	Grande Naine	Cavendish (AAA)	Buhangin, Davao City	Philippines
1683	Fusarium oxysporum	cubense	A	V	01213/16	G. Molina	Grande Naine	Cavendish (AAA)	Macopa, Comval Province	Philippines
1684	Fusarium oxysporum	cubense	A	V	01213	G. Molina	Grande Naine	Cavendish (AAA)	Monkayo, Comval Province	Philippines
1685	Fusarium oxysporum	cubense	A	V	01213/16	G. Molina	Williams	Cavendish (AAA)	Baguio Davao City	Philippines
1686	Fusarium oxysporum	/	/	/	Not compatible to known VCGs	G. Molina	Latundan	Silk (AAB)	Toril, Davao City	Philippines
1687	Fusarium oxysporum	/	/	/	Not compatible to known VCGs	G. Molina	Latundan	Silk (AAB)	Calinan, Davao City	Philippines
1688	Fusarium oxysporum	cubense	A	V	01213	G. Molina	Grande Naine	Cavendish (AAA)	Calinan, Davao City	Philippines
1689	Fusarium oxysporum	cubense	A	V	01216	G. Molina	Latundan	Silk (AAB)	Calinan, Davao City	Philippines
1691	Fusarium oxysporum	/	/	/	Not compatible to known VCGs	G. Molina	Latundan	Silk (AAB)	Calinan, Davao City	Philippines
1694	Fusarium oxysporum	/	/	/	Not compatible to known VCGs	G. Molina	Latundan	Silk (AAB)	Davao Del Norte	Philippines
1695	Fusarium spp.	/	/	/	/	G. Molina	Latundan	Silk (AAB)	Davao Del Norte	Philippines
1696	Fusarium oxysporum	cubense	A	V	01216	G. Molina	Tall Williams	Cavendish (AAA)	Toril, Davao City	Philippines
1697	Fusarium oxysporum	cubense	A	V	01213/16	G. Molina	Grande Naine	Cavendish (AAA)	Buhangin, Davao City	Philippines
1698	Fusarium oxysporum	cubense	A	V	01213/16	G. Molina	Grande Naine	Cavendish (AAA)	Buhangin, Davao City	Philippines
1699	Fusarium oxysporum	cubense	A	V	01213/16	G. Molina	Grande Naine	Cavendish (AAA)	Buhangin, Davao City	Philippines
1700	Fusarium oxysporum	cubense	A	V	01213/16	G. Molina	Grande Naine	Cavendish (AAA)	Buhangin, Davao City	Philippines
1701	Fusarium oxysporum	cubense	A	V	01213/16	G. Molina	Grande Naine	Cavendish (AAA)	Buhangin, Davao City	Philippines
1702	Fusarium oxysporum	cubense	A	V	01213/16	G. Molina	Grande Naine	Cavendish (AAA)	Tugbok, Davao City	Philippines
1703	Fusarium spp.	/	/	/	/	G. Molina	Lakatan	Lakatan (AAA)	Buhangin, Davao City	Philippines
1704	Fusarium oxysporum	/	/	/	Not compatible to known VCGs	G. Molina	Lakatan	Lakatan (AAA)	Buhangin, Davao City	Philippines
1705	Fusarium oxysporum	cubense	A	V	01213/16	I. Buddenhagen	Tall williams	Cavendish (AAA)	Toril, Davao City	Philippines
1706	Fusarium oxysporum	cubense	A	V	01213/16	I. Buddenhagen	No information provided	/	Davao City	Philippines
1707	Fusarium oxysporum	cubense	A	V	01213/16	I. Buddenhagen	Cavendish	Cavendish (AAA)	Davao City	Philippines
1708	Fusarium oxysporum	/	/	/	Self-incompatible	I. Buddenhagen	Cavendish	Cavendish (AAA)	Davao City	Philippines
1711	Fusarium oxysporum	cubense	A	V	01213	Ivan Buddenhagen	Loka dadi	Silk (AAB)	Tana Jampea	Indonesia
1712	Fusarium oxysporum	cubense	B	VI	0124	Ivan Buddenhagen	Loka dadi	Silk (AAB)	Sulawesi	Indonesia
1713	Fusarium oxysporum	cubense	B	VII	0123	Ivan Buddenhagen	Loka dadi	Silk (AAB)	Sumatra	Indonesia
1714	Fusarium oxysporum	cubense	A	V	01213	Ivan Buddenhagen	Loka pumbu	Other	Tana Jampea	Indonesia
1810	Fusarium oxysporum	/	/	/	Not compatible to known VCGs	Y.R, Wei, L.B., Xu	Guangfen	Pisang Awak (ABB)	GDAAS, Guangdong	China
1811	Fusarium oxysporum	cubense	A	V	01213	Y.R., Wei, L.B., Xu	Brazilian	Cavendish (AAA)	Fulus town, LeDong, HaiNan	China
1812	Fusarium oxysporum	cubense	A	V	01213	Y.R., Wei, L.B., Xu	Guangfen	Pisang Awak (ABB)	Baisha, HaiNan	China
1813	Fusarium oxysporum	cubense	A	V	01213	Y.R., Wei, L.B., Xu	Brazilian	Cavendish (AAA)	Xieji town, Gaozhou, Guangdong	China
1814	Fusarium oxysporum	cubense	A	V	01213	Y.R., Wei, L.B., Xu	Brazilian	Cavendish (AAA)	Skuikou town, XingYi, Guangdong	China
1815	Fusarium oxysporum	cubense	A	V	01213	Y.R., Wei, L.B., Xu	Guangfen	Pisang Awak (ABB)	Skuikou town, XingYi, Guangdong	China
1829	Fusarium spp.	/	/	/	/	G. Molina	Latundan	Silk (AAB)	Davao City	Philippines
1830	Fusarium spp.	/	/	/	/	G. Molina	No information provided	/	Batangas	Philippines
1832	Fusarium oxysporum	/	/	/	Self-incompatible	G. Molina	No information provided	/	Batangas	Philippines
1833	Fusarium oxysporum	/	/	/	Not compatible to known VCGs	G. Molina	No information provided	/	Queson	Philippines
1837	Fusarium oxysporum	/	/	/	Self-incompatible	G. Molina	No information provided	/	Laguna	Philippines
1839	Fusarium oxysporum	cubense	B	VII	0123	G. Molina	No information provided	/	Batangas	Philippines
1840	Fusarium oxysporum	/	/	/	Self-incompatible	G. Molina	No information provided	/	Queson	Philippines
1842	Fusarium spp.	/	/	/	/	G. Molina	No information provided	/	Batangas	Philippines
1844	Fusarium oxysporum	cubense	A	I/II	0126	G. Molina	Cardava	Saba (ABB)	Comval province	Philippines
1845	Fusarium oxysporum	/	/	/	Not compatible to known VCGs	G. Molina	Latundan	Silk (AAB)	Davao del Norte	Philippines
1846	Fusarium oxysporum	/	/	/	Not compatible to known VCGs	G. Molina	Latundan	Silk (AAB)	Davao City	Philippines
1847	Fusarium oxysporum	/	/	/	Not compatible to known VCGs	G. Molina	Latundan	Silk (AAB)	Davao City	Philippines
1848	Fusarium oxysporum	/	/	/	Self-incompatible	G. Molina	Latundan	Silk (AAB)	Davao City	Philippines
1849	Fusarium oxysporum	cubense	A	V	01213/16	G. Molina	Grande Naine	Cavendish (AAA)	Davao City	Philippines
1850	Fusarium oxysporum	/	/	/	Not compatible to known VCGs	G. Molina	Latundan	Silk (AAB)	Maguindanao	Philippines
1851	Fusarium oxysporum	cubense	B	VII	0123	G. Molina	Latundan	Silk (AAB)	Maguindanao	Philippines
1853	Fusarium oxysporum	/	/	/	Self-incompatible	G. Molina	Latundan	Silk (AAB)	Davao City	Philippines
1854	Fusarium oxysporum	/	/	/	Not compatible to known VCGs	G. Molina	Latundan	Silk (AAB)	Davao City	Philippines
1855	Fusarium oxysporum	cubense	A	V	01213/16	G. Molina	Grande Naine	Cavendish (AAA)	Davao City	Philippines
1856	Fusarium oxysporum	cubense	B	VII	0123	G. Molina	Latundan	Silk (AAB)	Davao City	Philippines
1857	Fusarium oxysporum	cubense	B	VII	0123	G. Molina	Latundan	Silk (AAB)	Comval Province	Philippines
1859	Fusarium oxysporum	/	/	/	Not compatible to known VCGs	G. Molina	Latundan	Silk (AAB)	Comval Province	Philippines
1860	Fusarium oxysporum	cubense	B	VII	0123	G. Molina	Latundan	Silk (AAB)	Comval Province	Philippines
1861	Fusarium oxysporum	cubense	B	VII	0123	G. Molina	Latundan	Silk (AAB)	Comval Province	Philippines
1862	Fusarium oxysporum	cubense	B	VII	0123	G. Molina	Latundan	Silk (AAB)	Davao Del Norte	Philippines
1863	Fusarium oxysporum	/	/	/	Not compatible to known VCGs	G. Molina	Latundan	Silk (AAB)	Davao City	Philippines
1864	Fusarium oxysporum	cubense	B	VII	0123	G. Molina	Latundan	Silk (AAB)	Davao City	Philippines
1865	Fusarium oxysporum	cubense	B	VII	0123	G. Molina	Latundan	Silk (AAB)	Davao City	Philippines
1866	Fusarium oxysporum	/	/	/	Not compatible to known VCGs	G. Molina	Latundan	Silk (AAB)	Davao City	Philippines
1867	Fusarium oxysporum	cubense	B	VII	0123	G. Molina	Latundan	Silk (AAB)	Davao City	Philippines
1868	Fusarium oxysporum	cubense	B	VII	0123	G. Molina	Grande Naine	Cavendish (AAA)	Davao City	Philippines
1870	Fusarium oxysporum	/	/	/	Not compatible to known VCGs	G. Molina	Latundan	Silk (AAB)	Davao Del Norte	Philippines
1871	Fusarium oxysporum	cubense	A	V	01213/16	G. Molina	Giant Cavendish	Cavendish (AAA)	Comval Province	Philippines
1872	Fusarium oxysporum	cubense	A	V	01213/16	G. Molina	Williams	Cavendish (AAA)	Comval Province	Philippines
1873	Fusarium oxysporum	cubense	A	I/II	0126	G. Molina	Cardava	Saba (ABB)	Comval Province	Philippines
1874	Fusarium spp.	/	/	/	/	G. Molina	Native Lakatan	Lakatan (AAA)	Davao City	Philippines
1875	Fusarium oxysporum	cubense	A	V	01213	G. Molina	Grande Naine	Cavendish (AAA)	Davao City	Philippines
1876	Fusarium oxysporum	cubense	A	IV	0122	G. Molina	Grande Naine	Cavendish (AAA)	Davao Del Norte	Philippines
1878	Fusarium oxysporum	cubense	A	IV	0122	G. Molina	Grande Naine	Cavendish (AAA)	Davao Del Norte	Philippines
1879	Fusarium oxysporum	cubense	B	VI	0124	Thangavelu Raman	Rasthali	Silk (AAB)	Sempatti, Samathuvapuram, Dindugal	India
1880	Fusarium oxysporum	cubense	B	VI	0124	Thangavelu Raman	Rasthali	Silk (AAB)	Seevalsaragu, Atthur	India
1881	Fusarium oxysporum	cubense	B	VI	0124/5	Thangavelu Raman	Rasthali	Silk (AAB)	Sengathampatti, Vathalagundu	India
1882	Fusarium oxysporum	cubense	B	VI	0125	Thangavelu Raman	Monthan	Monthan (ABB)	Muthulapuram, Nilakottai	India
1883	Fusarium oxysporum	cubense	B	VI	0125	Thangavelu Raman	Rasthali	Silk (AAB)	Sebathiapuram	India
1884	Fusarium oxysporum	cubense	B	VI	0124/5	Thangavelu Raman	Rasthali	Silk (AAB)	Irruvappapuram, Tuticorin	India
1885	Fusarium oxysporum	cubense	B	VI	0124	Thangavelu Raman	Rasthali	Silk (AAB)	Sevathiapuram, Tuticorn	India
1886	Fusarium oxysporum	cubense	B	VI	0124	Thangavelu Raman	Rasthali	Silk (AAB)	Earral	India
1887	Fusarium oxysporum	cubense	B	VI	0124	Thangavelu Raman	Neypoovan	Ney Poovan (AB)	Karungulam	India
1888	Fusarium oxysporum	cubense	B	VI	0124/5	Thangavelu Raman	Rasthali	Silk (AAB)	Morrapanadu, Palayamkottai	India
1889	Fusarium oxysporum	cubense	B	VI	01220	Thangavelu Raman	Neypoovan	Ney Poovan (AB)	Sengulam, Palayamkottai	India
1891	Fusarium oxysporum	/	/	/	Not compatible to known VCGs	Thangavelu Raman	Rasthali	Silk (AAB)	Valliyur, Vadakadu	India
1893	Fusarium oxysporum	cubense	B	VI	0124	Thangavelu Raman	Neypoovan	Ney Poovan (AB)	Ponnarvizhi, Agasthesvaram	India
1894	Fusarium oxysporum	cubense	B	VI	0124	Thangavelu Raman	Neypoovan	Ney Poovan (AB)	Thorakalputhur, Suseendram, N-Koil	India
1895	Fusarium oxysporum	cubense	B	VI	0125	Thangavelu Raman	Monthan	Monthan (ABB)	Thirumangalam, Madurai	India
1896	Fusarium oxysporum	cubense	B	VI	0124	Thangavelu Raman	Karpooravalli	Pisang Awak (ABB)	Kottukuppam, Pondicherry	India
1897	Fusarium oxysporum	cubense	B	VI	01220	Thangavelu Raman	Neypoovan	Ney Poovan (AB)	Vazhisothanipalayam	India
1898	Fusarium oxysporum	cubense	B	VI	0125	Thangavelu Raman	Monthan	Monthan (ABB)	C.Muttur, Chidambaram	India
1899	Fusarium oxysporum	cubense	B	VI	0125	Thangavelu Raman	Monthan	Monthan (ABB)	Keelamuttamkidai, C.Muttur, Chidamaram	India
1900	Fusarium oxysporum	cubense	B	VI	0125	Thangavelu Raman	Karpooravalli	Pisang Awak (ABB)	Peravurani, Pattukottai	India
1901	Fusarium oxysporum	cubense	B	VI	0124	Thangavelu Raman	Rasthali	Silk (AAB)	Thrissur	India
1902	Fusarium oxysporum	cubense	B	VI	0124	Thangavelu Raman	Neypoovan	Ney Poovan (AB)	Pallichal, Trivandrum	India
1903	Fusarium oxysporum	cubense	B	VI	01220	Thangavelu Raman	Karpooravalli	Pisang Awak (ABB)	Devasthanam, Kulithalai T.K, Karur dt	India
1904	Fusarium oxysporum	/	/	/	Not compatible to known VCGs	Thangavelu Raman	Rasthali	Silk (AAB)	Devasthanam, Kulithalai, Karur dt	India
1905	Fusarium spp.	/	/	/	/	Thangavelu Raman	Rasthali	Silk (AAB)	Mohanur, NKL dt	India
1906	Fusarium oxysporum	cubense	B	VI	0124/5	Thangavelu Raman	Karpooravalli	Pisang Awak (ABB)	Kasipalayam, Erode dt	India
1907	Fusarium oxysporum	/	/	/	Not compatible to known VCGs	Thangavelu Raman	Neypoovan	Ney Poovan (AB)	Sirumugai, CBE	India
1908	Fusarium oxysporum	/	/	/	Not compatible to known VCGs	Thangavelu Raman	Neypoovan	Ney Poovan (AB)	Sirumugai, Coimbatore dt	India
1909	Fusarium oxysporum	/	/	/	Not compatible to known VCGs	Thangavelu Raman	Monthan	Monthan (ABB)	Bhavani T.K, Erode dt	India
1910	Fusarium oxysporum	/	/	/	Not compatible to known VCGs	Thangavelu Raman	Hill Banana	Pome (AAB)	Thandikudi	India
1912	Fusarium oxysporum	cubense	B	VI	0125	Thangavelu Raman	Karpooravalli	Pisang Awak (ABB)	Dharmapuri town	India
1913	Fusarium oxysporum	cubense	B	VI	0124	Thangavelu Raman	Neypoovan	Ney Poovan (AB)	Mr.Thimma Gowda, Mandya dt, Kothathalli	India
1914	Fusarium oxysporum	cubense	B	VI	0125	Thangavelu Raman	Neypoovan	Ney Poovan (AB)	Mr.Nagaraj, Mysore	India
1915	Fusarium oxysporum	cubense	B	VI	0124	Thangavelu Raman	Neypoovan	Ney Poovan (AB)	Mr. K.Mathai, Gudalur	India
1916	Fusarium oxysporum	cubense	B	VI	0125	Thangavelu Raman	Rasthali	Silk (AAB)	Nanjankodu	India
1917	Fusarium oxysporum	cubense	B	VI	0124	Thangavelu Raman	Mortaman	Silk (AAB)	Amritapani, Lovur dt, West Godavari	India
1918	Fusarium oxysporum	cubense	B	VI	0125	Thangavelu Raman	Mortaman	Silk (AAB)	Amritapani, West Godavari, AP	India
1919	Fusarium oxysporum	cubense	B	VI	0124	Thangavelu Raman	Mortaman	Silk (AAB)	Amritapani, West Godavari, kovur dt, AP	India
1920	Fusarium oxysporum	cubense	B	VI	0124	Thangavelu Raman	Mortaman	Silk (AAB)	East Godavari	India
1921	Fusarium oxysporum	cubense	B	VI	0124	Thangavelu Raman	Mortaman	Silk (AAB)	Amlapuram, Ambajipet	India
1922	Fusarium oxysporum	cubense	B	VI	0124/5	Thangavelu Raman	Mortaman	Silk (AAB)	Angalakuthuru	India
1923	Fusarium oxysporum	cubense	B	VI	0124/5	Thangavelu Raman	Mortaman	Silk (AAB)	Angalakuthuru	India
1924	Fusarium oxysporum	cubense	B	VI	0124/5	Thangavelu Raman	Monthan	Monthan (ABB)	Angalakuthuru	India
1925	Fusarium oxysporum	cubense	B	VI	0124	Thangavelu Raman	Karpooravalli	Pisang Awak (ABB)	Jagdevpetta, Nellore	India
1926	Fusarium oxysporum	cubense	B	VI	0124	Thangavelu Raman	Neypoovan	Ney Poovan (AB)	Cuddalore	India
1927	Fusarium oxysporum	/	/	/	Not compatible to known VCGs	Thangavelu Raman	Rasthali	Silk (AAB)	Banana Research Station	India
1928	Fusarium oxysporum	cubense	B	VI	0124	Thangavelu Raman	Karpooravalli	Pisang Awak (ABB)	Karadialla	India
1929	Fusarium oxysporum	cubense	B	VI	0124	Thangavelu Raman	Rasthali	Silk (AAB)	Vellanikarra	India
1930	Fusarium oxysporum	cubense	B	VI	0124/5	Thangavelu Raman	Karpooravalli	Pisang Awak (ABB)	Vellanganoor	India
1931	Fusarium oxysporum	cubense	B	VI	0124/22	Thangavelu Raman	Karpooravalli	Pisang Awak (ABB)	Copiel east	India
1932	Fusarium oxysporum	cubense	B	VI	0124	Thangavelu Raman	Neypoovan	Ney Poovan (AB)	Vallikundam	India
1933	Fusarium oxysporum	/	/	/	Not compatible to known VCGs	Thangavelu Raman	Rasthali	Silk (AAB)	Kalvelipatti, Madurai	India
1934	Fusarium oxysporum	cubense	B	VI	0125	Thangavelu Raman	Monthan	Monthan (ABB)	Pudhupatti	India
1935	Fusarium oxysporum	cubense	B	VI	0125	Thangavelu Raman	Rasthali	Silk (AAB)	Pudhupatti	India
1936	Fusarium oxysporum	cubense	B	VI	0124/5	Thangavelu Raman	Rasthali	Silk (AAB)	Siruvaazhaigiramam	India
1937	Fusarium oxysporum	cubense	B	VI	0124	Thangavelu Raman	Monthan	Monthan (ABB)	Vaadipatti T.K	India
1938	Fusarium oxysporum	cubense	B	VI	0124	Thangavelu Raman	Monthan	Monthan (ABB)	Vaadipatti T.K	India
1939	Fusarium oxysporum	cubense	B	VI	0125	Thangavelu Raman	Monthan	Monthan (ABB)	Thiruparankundram	India
1940	Fusarium oxysporum	cubense	B	VI	0124	Thangavelu Raman	Monthan	Monthan (ABB)	Nilayoor	India
1941	Fusarium oxysporum	/	/	/	Not compatible to known VCGs	Thangavelu Raman	Malbhog	Silk (AAB)	Posinbaragaon, Guwahati, Assam	India
1942	Fusarium oxysporum	/	/	/	Not compatible to known VCGs	Thangavelu Raman	Manohar	Other (BB)	Not provided	India
1943	Fusarium oxysporum	cubense	B	VI	0124	Thangavelu Raman	Malbhog	Silk (AAB)	Kacharihat, Galaghat, Assam	India
1944	Fusarium oxysporum	cubense	B	VI	0124	Thangavelu Raman	Malbhog	Silk (AAB)	Khaloigaon, Nagaon dt, Oupholiabori village, Assam	India
1945	Fusarium oxysporum	cubense	B	VI	0124	Thangavelu Raman	Rasthali	Silk (AAB)	Thurayur	India
1956	Fusarium oxysporum	cubense	B	VI	0124	Thangavelu Raman	Karpooravalli	Pisang Awak (ABB)	Krishnapuram	India
1957	Fusarium oxysporum	cubense	B	VI	0128	Thangavelu Raman	Manohar	Other (BB)	Jarnapani, Nagaland	India
1958	Fusarium oxysporum	cubense	B	VI	0125	Dr. R.G.A.S Rajapakse	Silk	Silk (AAB)	No information provided	Sri Lanka
1959	Fusarium oxysporum	cubense	B	VII	01217	Dr. R.G.A.S Rajapakse	Silk	Silk (AAB)	No information provided	Sri Lanka
1960	Fusarium oxysporum	/	/	/	Not compatible to known VCGs	Dr. R.G.A.S Rajapakse	Silk	Silk (AAB)	No information provided	Sri Lanka
1961	Fusarium oxysporum	cubense	B	VI	0124	Dr. R.G.A.S Rajapakse	Ney Mannan	Ney Mannan (ABB)	No information provided	Sri Lanka
1962	Fusarium oxysporum	cubense	B	VI	01220	Dr. R.G.A.S Rajapakse	Ney Mannan	Ney Mannan (ABB)	No information provided	Sri Lanka
1963	Fusarium oxysporum	cubense	B	VI	0125	Dr. R.G.A.S Rajapakse	Ney Mannan	Ney Mannan (ABB)	No information provided	Sri Lanka
1964	Fusarium oxysporum	cubense	B	VI	0124	Dr. R.G.A.S Rajapakse	Pisang Awak	Pisang Awak (ABB)	No information provided	Sri Lanka
1966	Fusarium oxysporum	cubense	B	VI	0124	Dr. R.G.A.S Rajapakse	Red	Red (AAA)	No information provided	Sri Lanka
1967	Fusarium oxysporum	cubense	B	VI	0124	Dr. R.G.A.S Rajapakse	Silk	Silk (AAB)	No information provided	Sri Lanka
1968	Fusarium oxysporum	/	/	/	Not compatible to known VCGs	Dr. R.G.A.S Rajapakse	Silk	Silk (AAB)	No information provided	Sri Lanka
1969	Fusarium oxysporum	cubense	B	VI	0124	Dr. R.G.A.S Rajapakse	Silk	Silk (AAB)	No information provided	Sri Lanka
1970	Fusarium oxysporum	/	/	/	Not compatible to known VCGs	Dr. R.G.A.S Rajapakse	Silk	Silk (AAB)	No information provided	Sri Lanka
1971	Fusarium oxysporum	cubense	B	VI	0124	Dr. R.G.A.S Rajapakse	Pisang Awak	Pisang Awak (ABB)	No information provided	Sri Lanka
1972	Fusarium oxysporum	cubense	B	VI	0125	Dr. R.G.A.S Rajapakse	Pisang Awak	Pisang Awak (ABB)	No information provided	Sri Lanka
1973	Fusarium oxysporum	cubense	B	VI	0125	Dr. R.G.A.S Rajapakse	Pisang Awak	Pisang Awak (ABB)	No information provided	Sri Lanka
1974	Fusarium oxysporum	/	/	/	Not compatible to known VCGs	Dr. R.G.A.S Rajapakse	Gros Michel	Gros Michel (AAA)	No information provided	Sri Lanka
1977	Fusarium oxysporum	cubense	B	VII	0123	Teresita U. Dalisay	Latundan	Silk (AAB)	Isabela, Luzon	Philippines
1978	Fusarium oxysporum	cubense	B	VII	0123	Teresita U. Dalisay	Latundan	Silk (AAB)	Isabela, Luzon	Philippines
1979	Fusarium oxysporum	cubense	B	VII	0123	Teresita U. Dalisay	Latundan	Silk (AAB)	Isabela, Luzon	Philippines
1980	Fusarium oxysporum	cubense	B	VII	0123	Teresita U. Dalisay	Latundan	Silk (AAB)	Isabela, Luzon	Philippines
1981	Fusarium oxysporum	cubense	B	VII	0123	Teresita U. Dalisay	Latundan	Silk (AAB)	Quirino, Luzon	Philippines
1982	Fusarium oxysporum	cubense	B	VII	0123	Teresita U. Dalisay	Latundan	Silk (AAB)	Quirino, Luzon	Philippines
1983	Fusarium oxysporum	cubense	B	VII	0123	Teresita U. Dalisay	Latundan	Silk (AAB)	Quirino, Luzon	Philippines
1984	Fusarium oxysporum	cubense	B	VII	0123	Teresita U. Dalisay	Latundan	Silk (AAB)	Quirino, Luzon	Philippines
1985	Fusarium oxysporum	cubense	B	VII	0123	Teresita U. Dalisay	Latundan	Silk (AAB)	Nueva Vizcaya, Luzon	Philippines
1986	Fusarium oxysporum	cubense	B	VII	0123	Teresita U. Dalisay	Latundan	Silk (AAB)	Nueva Vizcaya, Luzon	Philippines
1987	Fusarium oxysporum	cubense	B	VII	0123	Teresita U. Dalisay	Latundan	Silk (AAB)	Nueva Vizcaya, Luzon	Philippines
1988	Fusarium oxysporum	cubense	B	VII	0123	Teresita U. Dalisay	Latundan	Silk (AAB)	Nueva Vizcaya, Luzon	Philippines
1989	Fusarium oxysporum	cubense	B	VI	0124/5	Dr. Doan Thi Thanh, Mai Thi Lien, Nguyen Bich Ngoc, Le Mai Nhat	Chuoi tay	Pisang Awak (ABB)	Phuc tho Town, Phuc tho district, Ha Tay Province	Vietnam
1990	Fusarium oxysporum	cubense	B	VI	0125	Dr. Doan Thi Thanh, Mai Thi Lien, Nguyen Bich Ngoc, Le Mai Nhat	Chuoi ngop	Bluggoe (ABB)	Phuc tho Town, Phuc tho district, Ha Tay Province	Vietnam
1991	Fusarium oxysporum	cubense	B	VI	0125	Dr. Doan Thi Thanh, Mai Thi Lien, Nguyen Bich Ngoc, Le Mai Nhat	Chuoi tay	Pisang Awak (ABB)	Phuc tho Town, Phuc tho district, Ha Tay Province	Vietnam
1992	Fusarium oxysporum	cubense	B	VI	0125	Dr. Doan Thi Thanh, Mai Thi Lien, Nguyen Bich Ngoc, Le Mai Nhat	Chuoi tay	Pisang Awak (ABB)	Phuc tho Town, Phuc tho district, Ha Tay Province	Vietnam
1993	Fusarium oxysporum	cubense	B	VI	0124/5	Dr. Doan Thi Thanh, Mai Thi Lien, Nguyen Bich Ngoc, Le Mai Nhat	Chuoi tay cao	Pisang Awak (ABB)	Xuan phu commune, Phuc tho district, Ha Tay Province	Vietnam
1994	Fusarium oxysporum	cubense	B	VI	0125	Dr. Doan Thi Thanh, Mai Thi Lien, Nguyen Bich Ngoc, Le Mai Nhat	Chuoi tay cao	Pisang Awak (ABB)	Xuan phu commune, Phuc tho district, Ha Tay Province	Vietnam
1995	Fusarium oxysporum	cubense	B	VI	0125	Dr. Doan Thi Thanh, Mai Thi Lien, Nguyen Bich Ngoc, Le Mai Nhat	Chuoi tay	Pisang Awak (ABB)	Van Thang commune, Bavi district, Ha Tay Province	Vietnam
1996	Fusarium oxysporum	cubense	B	VI	0124/5	Dr. Doan Thi Thanh, Mai Thi Lien, Nguyen Bich Ngoc, Le Mai Nhat	Chuoi tay	Pisang Awak (ABB)	Van Thang commune, Bavi district, Ha Tay Province	Vietnam
1997	Fusarium oxysporum	cubense	B	VI	0124/5	Dr. Doan Thi Thanh, Mai Thi Lien, Nguyen Bich Ngoc, Le Mai Nhat	Chuoi tay	Pisang Awak (ABB)	Lam Thao Join stock company	Vietnam
1998	Fusarium oxysporum	cubense	B	VI	0124	Dr. Doan Thi Thanh, Mai Thi Lien, Nguyen Bich Ngoc, Le Mai Nhat	Chuoi tay	Pisang Awak (ABB)	Ha loc commune, Phu ho district, Phu Tho Province	Vietnam
1999	Fusarium oxysporum	/	/	/	Not compatible to known VCGs	Dr. Doan Thi Thanh, Mai Thi Lien, Nguyen Bich Ngoc, Le Mai Nhat	Chuoi goong	Silk (AAB)	Van Lang commune, Phu tho town, Phu ho district, Phu Tho Province	Vietnam
2000	Fusarium oxysporum	/	/	/	Self-incompatible	Dr. Doan Thi Thanh, Mai Thi Lien, Nguyen Bich Ngoc, Le Mai Nhat	Chuoi tay cao	Pisang Awak (ABB)	Van Lang commune, Phu tho town, Phu ho district, Phu Tho Province	Vietnam
2001	Fusarium oxysporum	/	/	/	Not compatible to known VCGs	Dr. Doan Thi Thanh, Mai Thi Lien, Nguyen Bich Ngoc, Le Mai Nhat	Chuoi tay	Pisang Awak (ABB)	Xuan huy commune, Lam thao district, Phu Tho Province	Vietnam
2002	Fusarium oxysporum	cubense	B	VI	0125	Dr. Doan Thi Thanh, Mai Thi Lien, Nguyen Bich Ngoc, Le Mai Nhat	Chuoi tay	Pisang Awak (ABB)	Xuan huy commune, Lam thao district, Phu Tho Province	Vietnam
2003	Fusarium oxysporum	cubense	B	VI	0124	Dr. Doan Thi Thanh, Mai Thi Lien, Nguyen Bich Ngoc, Le Mai Nhat	Chuoi tay	Pisang Awak (ABB)	Xuan huy commune, Lam thao district, Phu Tho Province	Vietnam
2004	Fusarium oxysporum	cubense	B	VI	0125	Mai Thi Lien, Nguyen Nam Duong, Le Mai Nhat	Chuoi tay	Pisang Awak (ABB)	Dong tao commune, Khoai chau district, Hung Yen Province	Vietnam
2005	Fusarium oxysporum	cubense	B	VI	0125	Mai Thi Lien, Nguyen Nam Duong, Le Mai Nhat	Chuoi tay	Pisang Awak (ABB)	Dong tao commune, Khoai chau district, Hung Yen Province	Vietnam
2006	Fusarium oxysporum	cubense	B	VI	0125	Mai Thi Lien, Nguyen Nam Duong, Le Mai Nhat	Chuoi tay	Pisang Awak (ABB)	Binh Minh commune, Khoai chau district, Hung Yen Province	Vietnam
2007	Fusarium oxysporum	cubense	B	VI	0128	Mai Thi Lien, Nguyen Nam Duong, Le Mai Nhat	Chuoi tay	Pisang Awak (ABB)	Binh Minh commune, Khoai chau district, Hung Yen Province	Vietnam
2008	Fusarium oxysporum	cubense	B	VI	0124	Mai Thi Lien, Nguyen Nam Duong, Le Mai Nhat	Chuoi tay	Pisang Awak (ABB)	Binh Minh commune, Khoai chau district, Hung Yen Province	Vietnam
2009	Fusarium oxysporum	cubense	B	VI	0124/22	Mai Thi Lien, Nguyen Nam Duong, Le Mai Nhat	Chuoi tay	Pisang Awak (ABB)	Binh Minh commune, Khoai chau district, Hung Yen Province	Vietnam
2010	Fusarium oxysporum	cubense	B	VI	0124	Mai Thi Lien, Nguyen Nam Duong, Le Mai Nhat	Chuoi tay	Pisang Awak (ABB)	Binh Minh commune, Khoai chau district, Hung Yen Province	Vietnam
2011	Fusarium oxysporum	cubense	B	VI	0124/5	Mai Thi Lien, Nguyen Nam Duong, Le Mai Nhat	Chuoi tay	Pisang Awak (ABB)	Binh Minh commune, Khoai chau district, Hung Yen Province	Vietnam
2012	Fusarium oxysporum	cubense	B	VI	0124/5	Mai Thi Lien, Nguyen Nam Duong, Le Mai Nhat	Chuoi tay cao	Pisang Awak (ABB)	Me So commune, Khoai chau district, Hung Yen Province	Vietnam
2013	Fusarium oxysporum	cubense	B	VI	0128	Mai Thi Lien, Nguyen Nam Duong, Le Mai Nhat	Chuoi tay cao	Pisang Awak (ABB)	Van Giang town, Van giang district, Hung Yen Province	Vietnam
2014	Fusarium oxysporum	cubense	B	VI	0124/5	Mai Thi Lien, Nguyen Nam Duong, Le Mai Nhat	Chuoi tay cao	Pisang Awak (ABB)	Van Giang town, Van giang district, Hung Yen Province	Vietnam
2015	Fusarium oxysporum	cubense	B	VI	0124/5	Mai Thi Lien, Nguyen Nam Duong, Le Mai Nhat	Chuoi tay cao	Pisang Awak (ABB)	Van Giang town, Van giang district, Hung Yen Province	Vietnam
2016	Fusarium oxysporum	cubense	B	VI	0125	Mai Thi Lien, Nguyen Nam Duong, Le Mai Nhat	Chuoi tay	Pisang Awak (ABB)	Hoa hau commune, Ly nhan district, Ha Nam province	Vietnam
2017	Fusarium oxysporum	cubense	B	VI	0125	Mai Thi Lien, Nguyen Nam Duong, Le Mai Nhat	Chuoi tay	Pisang Awak (ABB)	Hoa hau commune, Ly nhan district, Ha Nam province	Vietnam
2019	Fusarium oxysporum	cubense	B	VI	0125	Dr. M. Sakhawat Hossain	Indigenous	Other	Paba, Rajshahi	Bangladesh
2020	Fusarium oxysporum	cubense	B	VI	0125	Dr. M. Sakhawat Hossain	Indigenous	Other	Paba, Rajshahi	Bangladesh
2021	Fusarium oxysporum	/	/	/	Not compatible to known VCGs	Dr. M. Sakhawat Hossain	Indigenous	Other	Paba, Rajshahi	Bangladesh
2022	Fusarium oxysporum	cubense	B	VI	0125	Dr. M. Sakhawat Hossain	Plantain	Plantain (AAB)	Kaligonj, Jhenidah	Bangladesh
2023	Fusarium oxysporum	cubense	B	VI	0124	Dr. M. Sakhawat Hossain	Plantain	Plantain (AAB)	Kaligonj, Jhenidah	Bangladesh
2024	Fusarium oxysporum	cubense	B	VI	0124	Dr. M. Sakhawat Hossain	Plantain	Plantain (AAB)	Kaligonj, Jhenidah	Bangladesh
2025	Fusarium oxysporum	cubense	B	VI	0124	Dr. M. Sakhawat Hossain	Sabri	Silk (AAB)	Sdar, Jssore	Bangladesh
2026	Fusarium oxysporum	cubense	B	VI	0125	Dr. M. Sakhawat Hossain	Indigenous	Other	Kaligonj, Jhenidah	Bangladesh
2027	Fusarium oxysporum	cubense	B	VI	0124/5	Dr. M. Sakhawat Hossain	Plantain	Plantain (AAB)	Sadar, Jhenidah	Bangladesh
2028	Fusarium oxysporum	cubense	B	VI	0124/5	Dr. M. Sakhawat Hossain	Plantain	Plantain (AAB)	Maheshpur, Jhenidah	Bangladesh
2029	Fusarium oxysporum	cubense	B	VI	01220	Dr. M. Sakhawat Hossain	Plantain	Plantain (AAB)	Chowgacha, Jessore	Bangladesh
2030	Fusarium spp.	/	/	/	/	Dr. M. Sakhawat Hossain	Indigenous	Other	Islampur, Jamalpur	Bangladesh
2031	Fusarium spp.	/	/	/	/	Dr. M. Sakhawat Hossain	Plantain	Plantain (AAB)	Islampur, Jamalpur	Bangladesh
2032	Fusarium oxysporum	cubense	B	VI	0124	Dr. M. Sakhawat Hossain	Indigenous	Other	Dewangonj, Jamalpur	Bangladesh
2033	Fusarium oxysporum	cubense	B	VI	0124/5	Dr. M. Sakhawat Hossain	Champa	Ney Poovan (AB)	Shibgonj, Bogra	Bangladesh
2034	Fusarium oxysporum	cubense	B	VI	0125	Dr. M. Sakhawat Hossain	Champa	Ney Poovan (AB)	Shibgonj, Bogra	Bangladesh
2035	Fusarium oxysporum	cubense	B	VII	01217	Dr. M. Sakhawat Hossain	Sabri	Silk (AAB)	Gabtali, Bogra	Bangladesh
2036	Fusarium oxysporum	cubense	B	VI	0124/5	Dr. M. Sakhawat Hossain	Champa	Ney Poovan (AB)	Shibonj, Bogra	Bangladesh
2037	Fusarium oxysporum	cubense	B	VI	0128	Dr. M. Sakhawat Hossain	Champa	Ney Poovan (AB)	Shibonj, Gobra	Bangladesh
2038	Fusarium oxysporum	cubense	B	VII	01217	Dr. M. Sakhawat Hossain	Champa	Ney Poovan (AB)	Shibonj, Gobra	Bangladesh
2039	Fusarium oxysporum	/	/	/	Not compatible to known VCGs	Dr. M. Sakhawat Hossain	Plantain	Plantain (AAB)	Gabindahgonji, Gaibandah	Bangladesh
2040	Fusarium oxysporum	/	/	/	Not compatible to known VCGs	Dr. M. Sakhawat Hossain	Plantain	Plantain (AAB)	Gabindahgonj, Gaibandah	Bangladesh
2041	Fusarium oxysporum	cubense	B	VI	0124/5	Dr. M. Sakhawat Hossain	Plantain	Plantain (AAB)	Babugonj, Barisal	Bangladesh
2042	Fusarium oxysporum	cubense	B	VI	0125	Dr. M. Sakhawat Hossain	Sabri	Silk (AAB)	Babugonj, Barisal	Bangladesh
2043	Fusarium oxysporum	/	/	/	Not compatible to known VCGs	Dr. M. Sakhawat Hossain	Sabri	Silk (AAB)	Babugonj, Barisal	Bangladesh
2044	Fusarium oxysporum	cubense	B	VI	0124/5	Dr. M. Sakhawat Hossain	Sabri	Silk (AAB)	Babugonj, Barisal	Bangladesh
2045	Fusarium oxysporum	/	/	/	Not compatible to known VCGs	Dr. M. Sakhawat Hossain	Sabri	Silk (AAB)	Babugonj, Barisal	Bangladesh
2046	Fusarium oxysporum	cubense	B	VI	0124/5	Dr. M. Sakhawat Hossain	Sabri	Silk (AAB)	Babugonj, Barisal	Bangladesh
2047	Fusarium oxysporum	/	/	/	Not compatible to known VCGs	Dr. M. Sakhawat Hossain	Sabri	Silk (AAB)	Babugonj, Barisal	Bangladesh
2048	Fusarium oxysporum	cubense	B	VI	0124/5	Dr. M. Sakhawat Hossain	Sabri	Silk (AAB)	Babugonj, Barisal	Bangladesh
2049	Fusarium oxysporum	cubense	B	VI	0124	Dr. M. Sakhawat Hossain	Sabri	Silk (AAB)	Babugonj, Barisal	Bangladesh
2050	Fusarium oxysporum	cubense	B	VI	0125	Dr. M. Sakhawat Hossain	Sabri	Silk (AAB)	Babugonj, Barisal	Bangladesh
2051	Fusarium oxysporum	cubense	B	VI	0124/5	Dr. M. Sakhawat Hossain	Sabri	Silk (AAB)	Babugonj, Barisal	Bangladesh
2052	Fusarium oxysporum	cubense	B	VI	0124/5	Dr. M. Sakhawat Hossain	Sabri	Silk (AAB)	Babugonj, Barisal	Bangladesh
2053	Fusarium oxysporum	cubense	B	VI	0125	Dr. M. Sakhawat Hossain	Sabri	Silk (AAB)	Babugonj, Barisal	Bangladesh
2054	Fusarium oxysporum	cubense	B	VI	0125	Dr. M. Sakhawat Hossain	Sabri	Silk (AAB)	Babugonj, Barisal	Bangladesh
2055	Fusarium oxysporum	cubense	B	VI	0124	Dr. M. Sakhawat Hossain	Sabri	Silk (AAB)	Babugonj, Barisal	Bangladesh
2056	Fusarium oxysporum	/	/	/	Not compatible to known VCGs	Nik Masdek	Rastali	Silk (AAB)	Seremban	Malaysia
2058	Fusarium oxysporum	cubense	A	V	01213/16	Nik Masdek	Berangan	Lakatan (AAA)	Seremban	Malaysia
2059	Fusarium oxysporum	cubense	A	V	01213/16	Nik Masdek	Berangan	Lakatan (AAA)	Seremban	Malaysia
2060	Fusarium oxysporum	cubense	A	V	01213/16	Nik Masdek	Mas	Sucrier (AA)	Port Dickson	Malaysia
2061	Fusarium oxysporum	cubense	A	V	01213	Nik Masdek	Port Dickson	Other	Berangan	Malaysia
2062	Fusarium oxysporum	cubense	A	V	01213/16	Nik Masdek	Berangan	Lakatan (AAA)	Port Dickson	Malaysia
2063	Fusarium oxysporum	cubense	A	V	01213/16	Nik Masdek	Mas	Sucrier (AA)	Port Dickson	Malaysia
2064	Fusarium oxysporum	cubense	A	V	01213/16	Nik Masdek	Berangan	Lakatan (AAA)	Remban	Malaysia
2065	Fusarium oxysporum	cubense	A	V	01213	Nik Masdek	Berangan	Lakatan (AAA)	Remban	Malaysia
2066	Fusarium oxysporum	cubense	A	V	01213/16	Nik Masdek	Berangan	Lakatan (AAA)	Remban	Malaysia
2068	Fusarium oxysporum	/	/	/	Self-incompatible	Nik Masdek	Berangan	Lakatan (AAA)	Tampin	Malaysia
2069	Fusarium oxysporum	cubense	A	V	01213/16	Nik Masdek	Berangan	Lakatan (AAA)	Knala Pilak	Malaysia
2071	Fusarium oxysporum	cubense	A	V	0121	Nik Masdek	Berangan	Lakatan (AAA)	Jelebu	Malaysia
2072	Fusarium oxysporum	cubense	A	V	01213	Nik Masdek	Berangan	Lakatan (AAA)	Jelebu	Malaysia
2073	Fusarium oxysporum	cubense	B	VII	01217	Nik Masdek	Rastah	Silk (AAB)	Jelebu	Malaysia
2074	Fusarium oxysporum	cubense	A	V	01213/16	Nik Masdek	Berangan	Lakatan (AAA)	Jelebu	Malaysia
2075	Fusarium oxysporum	/	/	/	Not compatible to known VCGs	Nik Masdek	Plantain	Plantain (AAB)	Knala Pilak	Malaysia
2076	Fusarium spp.	/	/	/	/	Nik Masdek	Berangan	Lakatan (AAA)	Jempol	Malaysia
2077	Fusarium oxysporum	cubense	A	V	01213/16	Nik Masdek	No information provided	/	Jempol	Malaysia
2078	Fusarium oxysporum	cubense	A	V	01213/16	Nik Masdek	Berangan	Lakatan (AAA)	Jelebu	Malaysia
2079	Fusarium oxysporum	cubense	A	V	01213/16	Nik Masdek	Emas	Sucrier (AA)	Selangor	Malaysia
2080	Fusarium oxysporum	cubense	A	V	01213/16	Nik Masdek	Berangan	Lakatan (AAA)	Melaka	Malaysia
2081	Fusarium oxysporum	cubense	A	V	01213/16	Nik Masdek	Berangan	Lakatan (AAA)	Melaka	Malaysia
2082	Fusarium oxysporum	cubense	A	V	01213/16	Nik Masdek	Berangan	Lakatan (AAA)	Perak	Malaysia
2083	Fusarium oxysporum	cubense	A	V	01213/16	Nik Masdek	Emas	Sucrier (AA)	Perak	Malaysia
2084	Fusarium oxysporum	/	/	/	Not compatible to known VCGs	Nik Masdek	Mas	Sucrier (AA)	Perak	Malaysia
2085	Fusarium oxysporum	cubense	A	V	01213/16	Nik Masdek	Berangan	Lakatan (AAA)	Perak	Malaysia
2086	Fusarium oxysporum	cubense	A	V	01213/16	Nik Masdek	Berangan	Lakatan (AAA)	Perak	Malaysia
2087	Fusarium oxysporum	cubense	A	V	01213/16	Nik Masdek	Emas	Sucrier (AA)	Perak	Malaysia
2088	Fusarium oxysporum	cubense	A	V	01213/16	Nik Masdek	Emas	Sucrier (AA)	Perak	Malaysia
2089	Fusarium oxysporum	cubense	B	VI	0124	Pros	Kluai Namwa	Pisang Awak (ABB)	Tang Krong, Svay Teap, Chamka leu, Kampong Cham	Cambodia
2090	Fusarium oxysporum	cubense	B	VI	0124	Chhun Sam Nat	Kluai Namwa	Pisang Awak (ABB)	Tang Krong, Svay Teap, Chamka leu, Kampong Cham	Cambodia
2091	Fusarium oxysporum	cubense	B	VI	0124	Chhun Sam Nat	Kluai Namwa	Pisang Awak (ABB)	Tang Krong, Svay Teap, Chamka leu, Kampong Cham	Cambodia
2092	Fusarium oxysporum	cubense	B	VI	0124	Chhun Sam Nat	Kluai Namwa	Pisang Awak (ABB)	Tang Krong, Svay Teap, Chamka leu, Kampong Cham	Cambodia
2093	Fusarium oxysporum	cubense	B	VI	0124	Chheng Vantha	Kluai Namwa	Pisang Awak (ABB)	Chrok Chambok, Chub, Tbong Khmom, Kampong Cham	Cambodia
2094	Fusarium oxysporum	cubense	B	VI	0125	Chheng Vantha	Kluai Namwa	Pisang Awak (ABB)	Chrok Chambok, Chub, Tbong Khmom, Kampong Cham	Cambodia
2095	Fusarium oxysporum	cubense	B	VI	0125	Tei	Kluai Namwa	Pisang Awak (ABB)	Tang Krong, Svay Teap, Chamka leu, Kampong Cham	Cambodia
2096	Fusarium oxysporum	cubense	B	VI	0125	Tei	Kluai Namwa	Pisang Awak (ABB)	Tang Krong, Svay Teap, Chamka leu, Kampong Cham	Cambodia
2097	Fusarium oxysporum	cubense	B	VI	0125	Seng Tieng	Kluai Namwa	Pisang Awak (ABB)	Chrok Chambok, Chub, Tbong Khmom, Kampong Cham	Cambodia
2098	Fusarium oxysporum	/	/	/	Not compatible to known VCGs	Tei	Kluai Namwa	Pisang Awak (ABB)	Tang Krong, Svay Teap, Chamka leu, Kampong Cham	Cambodia
2099	Fusarium oxysporum	cubense	B	VI	0124/5	Sim Sieng Ly	Kluai Namwa	Pisang Awak (ABB)	Thlong Tboung, Chan Moul, Memot Kampong Cham	Cambodia
2100	Fusarium oxysporum	cubense	B	VI	0124	Sambath	Kluai Namwa	Pisang Awak (ABB)	Tang Krong, Svay Teap, Chamka leu, Kampong Cham	Cambodia
2101	Fusarium spp.	/	/	/	/	Ly Lang	Kluai Namwa	Pisang Awak (ABB)	Ta Ong, Chamka Leu, Kampong Cham	Cambodia
2102	Fusarium oxysporum	/	/	/	Not compatible to known VCGs	Ly Lang	Kluai Namwa	Pisang Awak (ABB)	Ta Ong, Chamka Leu, Kampong Cham	Cambodia
2103	Fusarium oxysporum	/	/	/	Not compatible to known VCGs	Sambath	Kluai Namwa	Pisang Awak (ABB)	Tang Krong, Svay Teap, Chamka leu, Kampong Cham	Cambodia
2104	Fusarium oxysporum	cubense	B	VI	0124/5	Sambath	Kluai Namwa	Pisang Awak (ABB)	Tang Krong, Svay Teap, Chamka leu, Kampong Cham	Cambodia
2105	Fusarium oxysporum	cubense	B	VI	0124/5	Kong Sok Korn	Kluai Namwa	Pisang Awak (ABB)	Kandalgroam, Bontaydek, Kien Svay, Kandal	Cambodia
2106	Fusarium oxysporum	cubense	B	VI	0124	Kong Sok Korn	Kluai Namwa	Pisang Awak (ABB)	Kandalgroam, Bontaydek, Kien Svay, Kandal	Cambodia
2107	Fusarium spp.	/	/	/	/	Pros	Kluai Namwa	Pisang Awak (ABB)	Tang Krong, Svay Teap, Chamka leu, Kampong Cham	Cambodia
2108	Fusarium oxysporum	cubense	B	VII	01217	Pros	Kluai Namwa	Pisang Awak (ABB)	Tang Krong, Svay Teap, Chamka leu, Kampong Cham	Cambodia
2109	Fusarium oxysporum	cubense	B	VI	0124/5	Pros	Kluai Namwa	Pisang Awak (ABB)	Tang Krong, Svay Teap, Chamka leu, Kampong Cham	Cambodia
2110	Fusarium oxysporum	cubense	B	VI	0124	Chhun Sam Nat	Kluai Namwa	Pisang Awak (ABB)	Tang Krong, Svay Teap, Chamka leu, Kampong Cham	Cambodia
2111	Fusarium oxysporum	cubense	B	VI	0125	Ky Rang	Kluai Namwa	Pisang Awak (ABB)	Tang Krong, Svay Teap, Chamka leu, Kampong Cham	Cambodia
2112	Fusarium oxysporum	cubense	B	VI	0125	Tek	Kluai Namwa	Pisang Awak (ABB)	Tang Krong, Svay Teap, Chamka leu, Kampong Cham	Cambodia
2113	Fusarium oxysporum	cubense	B	VII	0123	Tek	Kluai Namwa	Pisang Awak (ABB)	Tang Krong, Svay Teap, Chamka leu, Kampong Cham	Cambodia
2114	Fusarium oxysporum	cubense	B	VI	0124	Tek	Kluai Namwa	Pisang Awak (ABB)	Tang Krong, Svay Teap, Chamka leu, Kampong Cham	Cambodia
2115	Fusarium oxysporum	cubense	B	VI	0124/5	Vorn Thorn	Kluai Namwa	Pisang Awak (ABB)	Tang Krong, Svay Teap, Chamka leu, Kampong Cham	Cambodia
2116	Fusarium oxysporum	cubense	B	VI	0125	Vorn Thorn	Kluai Namwa	Pisang Awak (ABB)	Tang Krong, Svay Teap, Chamka leu, Kampong Cham	Cambodia
2117	Fusarium oxysporum	cubense	B	VI	0124/5	Seng Tieng	Kluai Namwa	Pisang Awak (ABB)	Chrok Chambok, Chub, Tbong Khmom, Kampong Cham	Cambodia
2118	Fusarium oxysporum	cubense	B	VI	0124/5	Seng Tieng	Kluai Namwa	Pisang Awak (ABB)	Chrok Chambok, Chub, Tbong Khmom, Kampong Cham	Cambodia
2119	Fusarium oxysporum	cubense	B	/	01221	Chheng Vantha	Kluai Namwa	Pisang Awak (ABB)	Chrok Chambok, Chub, Tbong Khmom, Kampong Cham	Cambodia
2120	Fusarium oxysporum	cubense	B	/	01221	Chheng Vantha	Kluai Namwa	Pisang Awak (ABB)	Chrok Chambok, Chub, Tbong Khmom, Kampong Cham	Cambodia
2121	Fusarium oxysporum	cubense	B	VI	0124	Kong Sok Korn	Kluai Namwa	Pisang Awak (ABB)	Kandalgroam, Bontaydek, Kien Svay, Kandal	Cambodia
2122	Fusarium oxysporum	cubense	B	/	01221	Srey Oun	Kluai Namwa	Pisang Awak (ABB)	Pou Choeungka, Mong Rav, Tbong Khmom, Kampong Cham	Cambodia
2123	Fusarium oxysporum	cubense	B	VI	0124	Tei	Kluai Namwa	Pisang Awak (ABB)	Tang Krong, Svay Teap, Chamka leu, Kampong Cham	Cambodia
2124	Fusarium oxysporum	cubense	B	VI	0124/5	Heng Meng Loan	Kluai Namwa	Pisang Awak (ABB)	Ta Ong, Ta Ong, Chamka Leu, Kampong Cham	Cambodia
2125	Fusarium oxysporum	cubense	B	VI	0124/5	Heng Meng Loan	Kluai Namwa	Pisang Awak (ABB)	Ta Ong, Ta Ong, Chamka Leu, Kampong Cham	Cambodia
2126	Fusarium oxysporum	cubense	B	VI	0124/5	Heng Meng Loan	Kluai Namwa	Pisang Awak (ABB)	Ta Ong, Ta Ong, Chamka Leu, Kampong Cham	Cambodia
2127	Fusarium oxysporum	cubense	B	VI	0124	Vorn Thorn	Kluai Namwa	Pisang Awak (ABB)	Tang Krong, Svay Teap, Chamka leu, Kampong Cham	Cambodia
2128	Fusarium oxysporum	cubense	B	VI	0125	Vorn Thorn	Kluai Namwa	Pisang Awak (ABB)	Tang Krong, Svay Teap, Chamka leu, Kampong Cham	Cambodia
2129	Fusarium oxysporum	cubense	B	VI	0124	Vorn Thorn	Kluai Namwa	Pisang Awak (ABB)	Tang Krong, Svay Teap, Chamka leu, Kampong Cham	Cambodia
2130	Fusarium oxysporum	cubense	B	VI	0125	Vorn Thorn	Kluai Namwa	Pisang Awak (ABB)	Tang Krong, Svay Teap, Chamka leu, Kampong Cham	Cambodia
2131	Fusarium oxysporum	cubense	B	VI	0124/5	Chhun Sam Nat	Kluai Namwa	Pisang Awak (ABB)	Tang Krong, Svay Teap, Chamka leu, Kampong Cham	Cambodia
2132	Fusarium oxysporum	cubense	B	VI	0124	Ly Lang	Kluai Namwa	Pisang Awak (ABB)	Ta Ong, Ta Ong, Chamka Leu, Kampong Cham	Cambodia
2133	Fusarium spp.	/	/	/	/	Ly Lang	Kluai Namwa	Pisang Awak (ABB)	Ta Ong, Ta Ong, Chamka Leu, Kampong Cham	Cambodia
2134	Fusarium oxysporum	cubense	B	VII	01217	Ly Lang	Kluai Namwa	Pisang Awak (ABB)	Ta Ong, Ta Ong, Chamka Leu, Kampong Cham	Cambodia
2135	Fusarium oxysporum	cubense	B	VI	0124	Tei	Kluai Namwa	Pisang Awak (ABB)	Tang Krong, Svay Teap, Chamka leu, Kampong Cham	Cambodia
2136	Fusarium oxysporum	cubense	B	VI	0125	Vorn Thorn	Kluai Namwa	Pisang Awak (ABB)	Tang Krong, Svay Teap, Chamka leu, Kampong Cham	Cambodia
2137	Fusarium oxysporum	cubense	B	VI	0124/5	Vorn Thorn	Kluai Namwa	Pisang Awak (ABB)	Tang Krong, Svay Teap, Chamka leu, Kampong Cham	Cambodia
2138	Fusarium oxysporum	cubense	B	VI	0124	Tei	Kluai Namwa	Pisang Awak (ABB)	Tang Krong, Svay Teap, Chamka leu, Kampong Cham	Cambodia
2139	Fusarium oxysporum	cubense	B	VI	0124/5	Prak Saveng	Kluai Namwa	Pisang Awak (ABB)	Bak Keng, Bak Keng, Mok Kampoul, Kandal	Cambodia
2140	Fusarium oxysporum	cubense	B	VII	0123	Prak Saveng	Kluai Namwa	Pisang Awak (ABB)	Bak Keng, Bak Keng, Mok Kampoul, Kandal	Cambodia
2141	Fusarium oxysporum	cubense	B	VI	0124/5	Prak Saveng	Kluai Namwa	Pisang Awak (ABB)	Bak Keng, Bak Keng, Mok Kampoul, Kandal	Cambodia
2142	Fusarium oxysporum	cubense	B	VI	0124/5	Kampong Cham	Kluai Namwa	Pisang Awak (ABB)	Chrok Chambok, Chub, Tbong Khmom, Kampong Cham	Cambodia
2143	Fusarium oxysporum	cubense	B	/	01221	Srey Oun	Kluai Namwa	Pisang Awak (ABB)	Pou Choeungka, Mong Rav, Tbong Khmom, Kampong Cham	Cambodia
2144	Fusarium oxysporum	cubense	B	VI	0124/5	Pros	Kluai Namwa	Pisang Awak (ABB)	Tang Krong, Svay Teap, Chamka leu, Kampong Cham	Cambodia
2145	Fusarium oxysporum	cubense	B	VII	0123	Pros	Kluai Namwa	Pisang Awak (ABB)	Tang Krong, Svay Teap, Chamka leu, Kampong Cham	Cambodia
2146	Fusarium oxysporum	cubense	B	VI	0124/5	Pros	Kluai Namwa	Pisang Awak (ABB)	Tang Krong, Svay Teap, Chamka leu, Kampong Cham	Cambodia
2147	Fusarium oxysporum	/	/	/	Not compatible to known VCGs	Tei	Kluai Namwa	Pisang Awak (ABB)	Tang Krong, Svay Teap, Chamka leu, Kampong Cham	Cambodia
2148	Fusarium oxysporum	/	/	/	Not compatible to known VCGs	Chheng Long	Kluai Namwa	Pisang Awak (ABB)	Tang Krong, Svay Teap, Chamka leu, Kampong Cham	Cambodia
2149	Fusarium oxysporum	cubense	B	VI	0124/5	Ly Lang	Kluai Namwa	Pisang Awak (ABB)	Ta Ong, Ta Ong, Chamka Leu, Kampong Cham	Cambodia
2150	Fusarium spp.	/	/	/	/	Kong	Kluai Namwa	Pisang Awak (ABB)	Tang Krong, Svay Teap, Chamka leu, Kampong Cham	Cambodia
2151	Fusarium spp.	/	/	/	/	Kong	Kluai Namwa	Pisang Awak (ABB)	Tang Krong, Svay Teap, Chamka leu, Kampong Cham	Cambodia
2152	Fusarium oxysporum	/	/	/	Not compatible to known VCGs	Kong	Kluai Namwa	Pisang Awak (ABB)	Tang Krong, Svay Teap, Chamka leu, Kampong Cham	Cambodia
2153	Fusarium oxysporum	cubense	B	/	01221	Seng Tieng	Kluai Namwa	Pisang Awak (ABB)	Chrok Chambok, Chub, Tbong Khmom, Kampong Cham	Cambodia
2154	Fusarium spp.	/	/	/	/	Ang Phet	Kluai Namwa	Pisang Awak (ABB)	Chrok Chambok, Chub, Tbong Khmom, Kampong Cham	Cambodia
2155	Fusarium oxysporum	cubense	B	VI	0125	Ang Phet	Kluai Namwa	Pisang Awak (ABB)	Chrok Chambok, Chub, Tbong Khmom, Kampong Cham	Cambodia
2156	Fusarium oxysporum	cubense	B	VII	01218	Seng Tieng	Kluai Namwa	Pisang Awak (ABB)	Chrok Chambok, Chub, Tbong Khmom, Kampong Cham	Cambodia
2157	Fusarium oxysporum	cubense	B	VI	0125	Seng Tieng	Kluai Namwa	Pisang Awak (ABB)	Chrok Chambok, Chub, Tbong Khmom, Kampong Cham	Cambodia
2158	Fusarium oxysporum	cubense	B	VI	0125	Duch Chanthy	Kluai Namwa	Pisang Awak (ABB)	Pou Srok, Kong Kang, Ponnhear Krek, Kampong Cham	Cambodia
2159	Fusarium oxysporum	cubense	B	VI	0125	Duch Chanthy	Kluai Namwa	Pisang Awak (ABB)	Pou Srok, Kong Kang, Ponnhear Krek, Kampong Cham	Cambodia
2160	Fusarium oxysporum	cubense	B	VI	0125	Tei	Kluai Namwa	Pisang Awak (ABB)	Tang Krong, Svay Teap, Chamka leu, Kampong Cham	Cambodia
2161	Fusarium oxysporum	cubense	B	VI	0124	Tei	Kluai Namwa	Pisang Awak (ABB)	Tang Krong, Svay Teap, Chamka leu, Kampong Cham	Cambodia
2162	Fusarium oxysporum	/	/	/	Not compatible to known VCGs	Tei	Kluai Namwa	Pisang Awak (ABB)	Tang Krong, Svay Teap, Chamka leu, Kampong Cham	Cambodia
2163	Fusarium oxysporum	cubense	B	VI	0124/5	Vorn Thorn	Kluai Namwa	Pisang Awak (ABB)	Tang Krong, Svay Teap, Chamka leu, Kampong Cham	Cambodia
2164	Fusarium oxysporum	cubense	B	VI	0124/5	Pros	Kluai Namwa	Pisang Awak (ABB)	Tang Krong, Svay Teap, Chamka leu, Kampong Cham	Cambodia
2165	Fusarium oxysporum	cubense	B	VI	0125	Chhun Sam Nat	Kluai Namwa	Pisang Awak (ABB)	Tang Krong, Svay Teap, Chamka leu, Kampong Cham	Cambodia
2166	Fusarium oxysporum	cubense	B	VI	0124/5	Kong Sok Korn	Kluai Namwa	Pisang Awak (ABB)	Kandalgroam, Bontaydek, Kien Svay, Kandal	Cambodia
2167	Fusarium oxysporum	cubense	B	VI	0124/5	Kong Sok Korn	Kluai Namwa	Pisang Awak (ABB)	Kandalgroam, Bontaydek, Kien Svay, Kandal	Cambodia
2168	Fusarium oxysporum	/	/	/	Not compatible to known VCGs	Samphors	Kluai Namwa	Pisang Awak (ABB)	Choeung Long, Suong, Tbong Khmom, Kampong Cham	Cambodia
2169	Fusarium oxysporum	cubense	B	VI	0124/5	Srey Oun	Kluai Namwa	Pisang Awak (ABB)	Pou Choeungka, Mong Rav, Tbong Khmom, Kampong Cham	Cambodia
2170	Fusarium oxysporum	cubense	B	VI	0125	Ky Rang	Kluai Namwa	Pisang Awak (ABB)	Tang Krong, Svay Teap, Chamka leu, Kampong Cham	Cambodia
2171	Fusarium oxysporum	cubense	B	VI	0125	Ky Rang	Kluai Namwa	Pisang Awak (ABB)	Tang Krong, Svay Teap, Chamka leu, Kampong Cham	Cambodia
2172	Fusarium oxysporum	cubense	B	VI	0124	Chheng Long	Kluai Namwa	Pisang Awak (ABB)	Tang Krong, Svay Teap, Chamka leu, Kampong Cham	Cambodia
2173	Fusarium oxysporum	cubense	B	VI	0124/5	Sim Sieng Ly	Kluai Namwa	Pisang Awak (ABB)	Thlong Tboung, Chan Moul, Memot, Kampong Cham	Cambodia
2174	Fusarium oxysporum	cubense	B	VI	0124/5	Sim Sieng Ly	Kluai Namwa	Pisang Awak (ABB)	Thlong Tboung, Chan Moul, Memot, Kampong Cham	Cambodia
2175	Fusarium oxysporum	/	/	/	Not compatible to known VCGs	Duch Chanty	Kluai Namwa	Pisang Awak (ABB)	Pou Srok, Kong Kang, Ponnhear Krek, Kampong Cham	Cambodia
2176	Fusarium oxysporum	cubense	B	VI	0124/5	Duch Chanty	Kluai Namwa	Pisang Awak (ABB)	Pou Srok, Kong Kang, Ponnhear Krek, Kampong Cham	Cambodia
2177	Fusarium oxysporum	cubense	B	VI	0124	Tek	Kluai Namwa	Pisang Awak (ABB)	Tang Krong, Svay Teap, Chamka leu, Kampong Cham	Cambodia
2178	Fusarium oxysporum	cubense	B	VI	0124	Sambath	Kluai Namwa	Pisang Awak (ABB)	Tang Krong, Svay Teap, Chamka leu, Kampong Cham	Cambodia
2179	Fusarium oxysporum	cubense	B	VI	0124	Tei	Kluai Namwa	Pisang Awak (ABB)	Tang Krong, Svay Teap, Chamka leu, Kampong Cham	Cambodia
2180	Fusarium oxysporum	cubense	B	VI	0124/5	Tei	Kluai Namwa	Pisang Awak (ABB)	Tang Krong, Svay Teap, Chamka leu, Kampong Cham	Cambodia
2181	Fusarium oxysporum	cubense	B	VI	0124	Ky Rang	Kluai Namwa	Pisang Awak (ABB)	Tang Krong, Svay Teap, Chamka leu, Kampong Cham	Cambodia
2182	Fusarium oxysporum	cubense	B	VI	0124	Ky Rang	Kluai Namwa	Pisang Awak (ABB)	Tang Krong, Svay Teap, Chamka leu, Kampong Cham	Cambodia
2183	Fusarium oxysporum	cubense	B	VI	0124	Ky Rang	Kluai Namwa	Pisang Awak (ABB)	Tang Krong, Svay Teap, Chamka leu, Kampong Cham	Cambodia
2184	Fusarium oxysporum	cubense	B	VI	0124	Ky Rang	Kluai Namwa	Pisang Awak (ABB)	Tang Krong, Svay Teap, Chamka leu, Kampong Cham	Cambodia
2185	Fusarium oxysporum	cubense	B	VI	0124	Chhun Sam Nat	Kluai Namwa	Pisang Awak (ABB)	Tang Krong, Svay Teap, Chamka leu, Kampong Cham	Cambodia
2186	Fusarium oxysporum	cubense	B	VI	0124/5	Chhun Sam Nat	Kluai Namwa	Pisang Awak (ABB)	Tang Krong, Svay Teap, Chamka leu, Kampong Cham	Cambodia
2187	Fusarium oxysporum	cubense	B	VI	0124/5	Chhun Sam Nat	Kluai Namwa	Pisang Awak (ABB)	Tang Krong, Svay Teap, Chamka leu, Kampong Cham	Cambodia
2188	Fusarium oxysporum	cubense	B	VI	0124/5	Pros	Kluai Namwa	Pisang Awak (ABB)	Tang Krong, Svay Teap, Chamka leu, Kampong Cham	Cambodia
2189	Fusarium oxysporum	cubense	B	VI	0124/5	Thorn Kie	Kluai Namwa	Pisang Awak (ABB)	Chroy Ampil, Kbal Koh, Kien Svay, Kandal	Cambodia
2190	Fusarium oxysporum	cubense	B	VI	0124/5	Kong Sok Korn	Kluai Namwa	Pisang Awak (ABB)	Kandalgroam, Bontaydek, Kien Svay, Kandal	Cambodia
2191	Fusarium oxysporum	cubense	B	/	01221	Thorn Kie	Kluai Namwa	Pisang Awak (ABB)	Chroy Ampil, Kbal Koh, Kien Svay, Kandal	Cambodia
2192	Fusarium oxysporum	cubense	B	VI	0124	Prak Saveng	Kluai Namwa	Pisang Awak (ABB)	Bak Keng, Bak Keng, Mok Kampoul, Kandal	Cambodia
2193	Fusarium oxysporum	cubense	B	VI	0124/5	Duch Chanthy	Kluai Namwa	Pisang Awak (ABB)	Pou Srok, Kong Kang, Ponnhear Krek, Kampong Cham	Cambodia
2194	Fusarium oxysporum	cubense	B	VI	0124	Duch Chanthy	Kluai Namwa	Pisang Awak (ABB)	Pou Srok, Kong Kang, Ponnhear Krek, Kampong Cham	Cambodia
2195	Fusarium oxysporum	cubense	B	VI	0125	Duch Chanthy	Kluai Namwa	Pisang Awak (ABB)	Pou Srok, Kong Kang, Ponnhear Krek, Kampong Cham	Cambodia
2196	Fusarium oxysporum	cubense	B	VI	0125	Duch Chanthy	Kluai Namwa	Pisang Awak (ABB)	Pou Srok, Kong Kang, Ponnhear Krek, Kampong Cham	Cambodia
2197	Fusarium oxysporum	cubense	B	VI	0124/5	Sambath	Kluai Namwa	Pisang Awak (ABB)	Tang Krong, Svay Teap, Chamka leu, Kampong Cham	Cambodia
2198	Fusarium oxysporum	cubense	B	VI	0124/5	Tang Krong, Svay Teap, Chamka leu, Kampong Cham	Kluai Namwa	Pisang Awak (ABB)	Tang Krong, Svay Teap, Chamka leu, Kampong Cham	Cambodia
2199	Fusarium oxysporum	cubense	B	VII	0123	Kong Sok Korn	Kluai Namwa	Pisang Awak (ABB)	Kandalgroam, Bontaydek, Kien Svay, Kandal	Cambodia
2200	Fusarium oxysporum	cubense	B	VI	0124	Kong Sok Korn	Kluai Namwa	Pisang Awak (ABB)	Kandalgroam, Bontaydek, Kien Svay, Kandal	Cambodia
2201	Fusarium oxysporum	cubense	B	VI	0124/5	Kong Sok Korn	Kluai Namwa	Pisang Awak (ABB)	Kandalgroam, Bontaydek, Kien Svay, Kandal	Cambodia
2202	Fusarium oxysporum	cubense	B	VI	0124	Sot March	Kluai Namwa	Pisang Awak (ABB)	Tuol Tnoat, Kor Ki, Kien Svay, Kandal	Cambodia
2203	Fusarium oxysporum	cubense	B	/	01221	Thorn Kie	Kluai Namwa	Pisang Awak (ABB)	Chroy Ampil, Kbal Koh, Kien Svay, Kandal	Cambodia
2204	Fusarium oxysporum	cubense	B	VI	0124	Chheng Long	Kluai Namwa	Pisang Awak (ABB)	Tang Krong, Svay Teap, Chamka leu, Kampong Cham	Cambodia
2205	Fusarium oxysporum	cubense	B	VI	0124	Chheng Long	Kluai Namwa	Pisang Awak (ABB)	Tang Krong, Svay Teap, Chamka leu, Kampong Cham	Cambodia
2206	Fusarium oxysporum	cubense	B	VI	0124	Chheng Long	Kluai Namwa	Pisang Awak (ABB)	Tang Krong, Svay Teap, Chamka leu, Kampong Cham	Cambodia
2207	Fusarium oxysporum	cubense	B	VI	0124	Van Tei	Kluai Namwa	Pisang Awak (ABB)	Tang Krong, Svay Teap, Chamka leu, Kampong Cham	Cambodia
2208	Fusarium oxysporum	cubense	B	VI	0124/5	Sambath	Kluai Namwa	Pisang Awak (ABB)	Tang Krong, Svay Teap, Chamka leu, Kampong Cham	Cambodia
2209	Fusarium oxysporum	/	/	/	Not compatible to known VCGs	Thun Vang	Kluai Namwa	Pisang Awak (ABB)	Bak Keng, Bak Keng, Mok Kampoul, Kandal	Cambodia
2210	Fusarium oxysporum	cubense	B	VI	0124/5	Thun Vang	Kluai Namwa	Pisang Awak (ABB)	Bak Keng, Bak Keng, Mok Kampoul, Kandal	Cambodia
2211	Fusarium oxysporum	cubense	B	VI	0125	Thun Vang	Kluai Namwa	Pisang Awak (ABB)	Bak Keng, Bak Keng, Mok Kampoul, Kandal	Cambodia
2212	Fusarium oxysporum	cubense	B	VI	0124/5	Prak Saveng	Kluai Namwa	Pisang Awak (ABB)	Bak Keng, Bak Keng, Mok Kampoul, Kandal	Cambodia
2213	Fusarium oxysporum	cubense	B	VI	0124/5	Sot March	Kluai Namwa	Pisang Awak (ABB)	Tuol Tnoat, Kor Ki, Kien Svay, Kandal	Cambodia
2215	Fusarium oxysporum	cubense	B	VI	0124/5	Kong Sok Korn	Kluai Namwa	Pisang Awak (ABB)	Kandalgroam, Bontaydek, Kien Svay, Kandal	Cambodia
2216	Fusarium oxysporum	cubense	B	VI	0124	Phorn Sam Ang	Kluai Namwa	Pisang Awak (ABB)	Bak Keng, Bak Keng, Mok Kampoul, Kandal	Cambodia
2217	Fusarium oxysporum	cubense	B	VI	0124/5	Prak Saveng	Kluai Namwa	Pisang Awak (ABB)	Bak Keng, Bak Keng, Mok Kampoul, Kandal	Cambodia
2218	Fusarium oxysporum	cubense	B	VI	0124/22	Muon Yoeurn	Kluai Namwa	Pisang Awak (ABB)	Prek Ta Pring, Setbou, Saang, Kandal	Cambodia
2219	Fusarium oxysporum	cubense	B	VI	0128	Muon Yoeurn	Kluai Namwa	Pisang Awak (ABB)	Prek Ta Pring, Setbou, Saang, Kandal	Cambodia
2220	Fusarium oxysporum	cubense	B	VI	0125	Muon Yoeurn	Kluai Namwa	Pisang Awak (ABB)	Prek Ta Pring, Setbou, Saang, Kandal	Cambodia
2221	Fusarium oxysporum	cubense	B	VI	0125	Tek	Kluai Namwa	Pisang Awak (ABB)	Tang Krong, Svay Teap, Chamka leu, Kampong Cham	Cambodia
2222	Fusarium oxysporum	cubense	B	VI	0124/5	Tek	Kluai Namwa	Pisang Awak (ABB)	Tang Krong, Svay Teap, Chamka leu, Kampong Cham	Cambodia
2223	Fusarium oxysporum	cubense	B	VI	0128	Sambath	Kluai Namwa	Pisang Awak (ABB)	Tang Krong, Svay Teap, Chamka leu, Kampong Cham	Cambodia
2224	Fusarium oxysporum	cubense	B	VI	0124/5	Meas Sorphea	Kluai Namwa	Pisang Awak (ABB)	Prek Ta Pring, Setbou, Saang, Kandal	Cambodia
2225	Fusarium oxysporum	cubense	B	/	01221	Thorn Kie	Kluai Namwa	Pisang Awak (ABB)	Chroy Ampil, Kbal Koh, Kien Svay, Kandal	Cambodia
2226	Fusarium oxysporum	cubense	B	/	01221	Thorn Kie	Kluai Namwa	Pisang Awak (ABB)	Chroy Ampil, Kbal Koh, Kien Svay, Kandal	Cambodia
2227	Fusarium oxysporum	cubense	B	/	01221	Thorn Kie	Kluai Namwa	Pisang Awak (ABB)	Chroy Ampil, Kbal Koh, Kien Svay, Kandal	Cambodia
2228	Fusarium oxysporum	cubense	B	VI	0124	Em Thol	Kluai Namwa	Pisang Awak (ABB)	Prek Thmey, Kien Svay, Kien Svay, Kandal	Cambodia
2229	Fusarium oxysporum	cubense	B	VI	0124/5	Kong Sok Korn	Kluai Namwa	Pisang Awak (ABB)	Not provided	Cambodia
2230	Fusarium oxysporum	cubense	B	VI	0124/5	Phorn Sam Ang	Kluai Namwa	Pisang Awak (ABB)	Bak Keng, Bak Keng, Mok Kampoul, Kandal	Cambodia
2231	Fusarium oxysporum	cubense	B	VI	0124	Sambath	Kluai Namwa	Pisang Awak (ABB)	Tang Krong, Svay Teap, Chamka leu, Kampong Cham	Cambodia
2232	Fusarium oxysporum	cubense	B	VI	0124/5	Meas Sorphea	Kluai Namwa	Pisang Awak (ABB)	Prek Ta Pring, Setbou, Saang, Kandal	Cambodia
2233	Fusarium oxysporum	cubense	B	VI	0124/5	Kong Sok Korn	Kluai Namwa	Pisang Awak (ABB)	Kandalgroam, Bontaydek, Kien Svay, Kandal	Cambodia
2234	Fusarium oxysporum	cubense	B	VII	0123	Sot March	Kluai Namwa	Pisang Awak (ABB)	Tuol Tnoat, Kor Ki, Kien Svay, Kandal	Cambodia
2235	Fusarium oxysporum	cubense	B	VI	0124/5	Prak Saveng	Kluai Namwa	Pisang Awak (ABB)	Bak Keng, Bak Keng, Mok Kampoul, Kandal	Cambodia
2236	Fusarium oxysporum	cubense	B	VI	0124/5	Meas Sorphea	Kluai Namwa	Pisang Awak (ABB)	Prek Ta Pring, Setbou, Saang, Kandal	Cambodia
2237	Fusarium oxysporum	cubense	B	VII	0123	Prak Saveng	Kluai Namwa	Pisang Awak (ABB)	Bak Keng, Bak Keng, Mok Kampoul, Kandal	Cambodia
2238	Fusarium oxysporum	cubense	B	VI	0124/5	Prak Saveng	Kluai Namwa	Pisang Awak (ABB)	Bak Keng, Bak Keng, Mok Kampoul, Kandal	Cambodia
2239	Fusarium oxysporum	cubense	B	VI	0124/5	Sambath	Kluai Namwa	Pisang Awak (ABB)	Tang Krong, Svay Teap, Chamka leu, Kampong Cham	Cambodia
2240	Fusarium oxysporum	cubense	B	VI	0124	Sambath	Kluai Namwa	Pisang Awak (ABB)	Tang Krong, Svay Teap, Chamka leu, Kampong Cham	Cambodia
2241	Fusarium oxysporum	cubense	B	VI	0124	Sambath	Kluai Namwa	Pisang Awak (ABB)	Tang Krong, Svay Teap, Chamka leu, Kampong Cham	Cambodia
2242	Fusarium oxysporum	cubense	B	VI	0124	Sambath	Kluai Namwa	Pisang Awak (ABB)	Tang Krong, Svay Teap, Chamka leu, Kampong Cham	Cambodia
2243	Fusarium oxysporum	cubense	B	VI	0124/5	Sambath	Kluai Namwa	Pisang Awak (ABB)	Tang Krong, Svay Teap, Chamka leu, Kampong Cham	Cambodia
2244	Fusarium oxysporum	cubense	B	/	01221	Samphors	Kluai Namwa	Pisang Awak (ABB)	Choeung Long, Suong, Tbong Khmom, Kampong Cham	Cambodia
2245	Fusarium oxysporum	cubense	B	VI	0125	Kong Sok Korn	Kluai Namwa	Pisang Awak (ABB)	Kandalgroam, Bontaydek, Kien Svay, Kandal	Cambodia
2246	Fusarium oxysporum	cubense	B	/	01221	Chheng Vantha	Kluai Namwa	Pisang Awak (ABB)	Chrok Chambok, Chub, Tbong Khmom, Kampong Cham	Cambodia
2247	Fusarium oxysporum	cubense	B	/	01221	Seng Tieng	Kluai Namwa	Pisang Awak (ABB)	Chrok Chambok, Chub, Tbong Khmom, Kampong Cham	Cambodia
2248	Fusarium oxysporum	cubense	B	/	01221	Seng tieng	Kluai Namwa	Pisang Awak (ABB)	Chrok Chambok, Chub, Tbong Khmom, Kampong Cham	Cambodia
2249	Fusarium oxysporum	cubense	B	VI	01222	Chheng Long	Kluai Namwa	Pisang Awak (ABB)	Tang Krong, Svay Teap, Chamka leu, Kampong Cham	Cambodia
2250	Fusarium oxysporum	cubense	B	VI	0125	BSc. Le Mai Nhat, Nguyen Bich Ngoc	Chuoi Goong	Silk (AAB)	Song Quynh commune, Gia binh district, Bac Ninh Province	Vietnam
2251	Fusarium oxysporum	cubense	B	VI	0124	BSc. Le Mai Nhat, Nguyen Bich Ngoc	Chuoi Goong	Silk (AAB)	Song Quynh commune, Gia binh district, Bac Ninh Province	Vietnam
2252	Fusarium oxysporum	cubense	B	VII	0123	BSc. Le Mai Nhat, Nguyen Bich Ngoc	Chuoi Goong	Silk (AAB)	Gia Lam town, Long Bien district, Ha Noi Province	Vietnam
2254	Fusarium oxysporum	cubense	B	/	01221	BSc. Le Mai Nhat, Nguyen Bich Ngoc	Chuoi Su	Pisang Awak (ABB)	Hoa Phu commune, Chau Thanh district, Long An province	Vietnam
2255	Fusarium oxysporum	cubense	B	VI	0125	BSc. Le Mai Nhat	Chuoi Goong	Silk (AAB)	Gia Lam town, Long Bien district, Ha Noi Province	Vietnam
2256	Fusarium oxysporum	cubense	B	VI	0124/5	BSc. Le Mai Nhat, Nguyen Bich Ngoc	Chuoi Su	Pisang Awak (ABB)	Hoa Phu commune, Chau Thanh district, Long An province	Vietnam
2257	Fusarium oxysporum	/	/	/	Not compatible to known VCGs	Dr. R.G.A.S Rajapakse	Gros Michel	Gros Michel (AAA)	Eraminigolla, Kegalle, Sabaragamuwa	Sri Lanka
2258	Fusarium oxysporum	/	/	/	Self-incompatible	Dr. R.G.A.S Rajapakse	Gros Michel	Gros Michel (AAA)	Eraminigolla, Kegalle, Sabaragamuwa	Sri Lanka
2259	Fusarium oxysporum	cubense	B	VI	0124	Dr. R.G.A.S Rajapakse	Gros Michel	Gros Michel (AAA)	Eraminigolla, Kegalle, Sabaragamuwa	Sri Lanka
2260	Fusarium oxysporum	cubense	B	VI	0124	Dr. R.G.A.S Rajapakse	Gros Michel	Gros Michel (AAA)	Katugastota, Katugastota, Central	Sri Lanka
2261	Fusarium oxysporum	/	/	/	Not compatible to known VCGs	Dr. R.G.A.S Rajapakse	Gros Michel	Gros Michel (AAA)	Korathota, Kaduwela, Western	Sri Lanka
2262	Fusarium oxysporum	/	/	/	Not compatible to known VCGs	Dr. R.G.A.S Rajapakse	Gros Michel	Gros Michel (AAA)	Udasgiriya, Yatawatthe, central	Sri Lanka
2263	Fusarium oxysporum	/	/	/	Not compatible to known VCGs	Dr. R.G.A.S Rajapakse	Gros Michel	Gros Michel (AAA)	Walawela, Mathale, Central	Sri Lanka
2264	Fusarium oxysporum	/	/	/	Not compatible to known VCGs	Dr. R.G.A.S Rajapakse	Gros Michel	Gros Michel (AAA)	Ebulpitiya, A;kaduwa, Central	Sri Lanka
2265	Fusarium oxysporum	cubense	B	VI	0124	Dr. R.G.A.S Rajapakse	Prasang Awak	Pisang Awak (ABB)	Kurukuththala, Kadugannawa, Central	Sri Lanka
2266	Fusarium oxysporum	/	/	/	Not compatible to known VCGs	Dr. R.G.A.S Rajapakse	Red	Red (AAA)	Udunuwara, Central	Sri Lanka
2267	Fusarium oxysporum	/	/	/	Not compatible to known VCGs	Dr. R.G.A.S Rajapakse	No information provided	/	Korathota, Kaduwela, Western	Sri Lanka
2268	Fusarium oxysporum	cubense	B	VII	0123	Nik Masdek	Awak	Pisang Awak (ABB)	Rasan Pekam, Kuantan, Panang	Malaysia
2269	Fusarium oxysporum	cubense	A	V	01213	Nik Masdek	Mas	Sucrier (AA)	Rasan Pekam, Kuantan, Panang	Malaysia
2270	Fusarium spp.	/	/	/	/	Nik Masdek	Nipah	/	Sungai Tongkang, Rengit, Johor	Malaysia
2271	Fusarium oxysporum	/	/	/	Not compatible to known VCGs	Nik Masdek	Pisang Kapas	Ibota (AAA)	Panchor, Jerangan Sungai, Dungan, Treuggann	Malaysia
2272	Fusarium oxysporum	/	/	/	Not compatible to known VCGs	Nik Masdek	Awak	Pisang Awak (ABB)	Beoh, Gunong Bachok, Kelantan	Malaysia
2274	Fusarium oxysporum	cubense	B	VII	0123	Nik Masdek	Awak	Pisang Awak (ABB)	Shukor, Pasir Raj Dungan, Trenggann	Malaysia
2275	Fusarium oxysporum	/	/	/	Not compatible to known VCGs	Nik Masdek	Berangan	Lakatan (AAA)	Mujor, Jelawat Bachok, Kelantan	Malaysia
2276	Fusarium oxysporum	cubense	A	V	01213/16	Nik Masdek	Pisang Raja	Pisang Raja (AAB)	Shukor, Pasir Raja Dungan, Trenggann	Malaysia
2278	Fusarium oxysporum	cubense	B	VII	01217	Nik Masdek	No information provided	/	Tok Sangkut, Pasir Mas, Kelantan	Malaysia
2279	Fusarium oxysporum	/	/	/	Not compatible to known VCGs	Nik Masdek	No information provided	/	Kaldong Tna, Kota Bharn, Kelantan	Malaysia
2280	Fusarium oxysporum	cubense	B	VI	0128	Nik Masdek	No information provided	/	Air Canal, Jeh, Kelantan	Malaysia
2281	Fusarium oxysporum	/	/	/	Not compatible to known VCGs	Nik Masdek	Awak	Pisang Awak (ABB)	Permutang Lawang, Mukim Penoir, Kuantan, Pahang	Malaysia
2282	Fusarium oxysporum	cubense	B	VI	0125	Nik Masdek	Berangan	Lakatan (AAA)	Jin Gambang, Kuantan, Pahang	Malaysia
2283	Fusarium oxysporum	cubense	A	V	01213/16	Nik Masdek	Berangan	Lakatan (AAA)	Enggong, Knala Krai, Kelantan	Malaysia
2284	Fusarium oxysporum	cubense	A	V	01213/16	Nik Masdek	Berangan	Lakatan (AAA)	Pulan Manis Gambang, Kuantan, Panang	Malaysia
2285	Fusarium oxysporum	cubense	B	VII	01217	Nik Masdek	No information provided	/	Durian Hijan, Pulau Chondong Machang, Kelantan	Malaysia
2286	Fusarium oxysporum	cubense	A	V	01213/16	Nik Masdek	Berangan	Lakatan (AAA)	Gna Salor, Kota Bharn, Kelantan	Malaysia
2287	Fusarium oxysporum	/	/	/	Not compatible to known VCGs	Nik Masdek	Berangan	Lakatan (AAA)	Teratak Batn, Pasir Putek, Kelantan	Malaysia
2288	Fusarium oxysporum	cubense	A	V	01213	Nik Masdek	Pisang Awak	Pisang Awak (ABB)	Seberang Tayor Hulu, Kemaman, Trenggann	Malaysia
2289	Fusarium oxysporum	cubense	A	V	01213	Nik Masdek	No information provided	/	Terasil, Tanah Merah, Kelantan	Malaysia
2290	Fusarium oxysporum	cubense	A	V	01213	Nik Masdek	Berangan	Lakatan (AAA)	Kubang Hakim, Kelantan	Malaysia
2291	Fusarium oxysporum	cubense	A	V	01213	S.P. Chen	Pei-Chiao	Cavendish (AAA)	Likang N,	Taiwan
2292	Fusarium oxysporum	cubense	A	V	01213/16	S.P. Chen	Pei-Chiao	Cavendish (AAA)	Likang N	Taiwan
2293	Fusarium oxysporum	cubense	A	V	01213	S.P. Chen	Pei-Chiao	Cavendish (AAA)	Kaosu SW	Taiwan
2294	Fusarium spp.	/	/	/	/	S.P. Chen	Pei-Chiao	Cavendish (AAA)	Kaosu SW	Taiwan
2295	Fusarium oxysporum	cubense	A	V	01213	S.P. Chen	Pei-Chiao	Cavendish (AAA)	Hsinpi	Taiwan
2296	Fusarium oxysporum	cubense	A	V	01213	S.P. Chen	Pei-Chiao	Cavendish (AAA)	Suonton W	Taiwan
2297	Fusarium oxysporum	cubense	A	V	01213	S.P. Chen	Pei-Chiao	Cavendish (AAA)	Suonton W	Taiwan
2298	Fusarium oxysporum	cubense	A	V	01213	S.P. Chen	Pei-Chiao	Cavendish (AAA)	Tsaotun	Taiwan
2299	Fusarium oxysporum	cubense	A	V	01213/16	S.P. Chen	Pei-Chiao	Cavendish (AAA)	Tatung SW	Taiwan
2300	Fusarium oxysporum	cubense	A	V	01213	S.P. Chen	Pei-Chiao	Cavendish (AAA)	Luyei SW	Taiwan
2301	Fusarium oxysporum	cubense	A	V	01213	S.P. Chen	Pei-Chiao	Cavendish (AAA)	Luyei SW	Taiwan
2302	Fusarium oxysporum	cubense	A	V	01213/16	S.P. Chen	Pei-Chiao	Cavendish (AAA)	Chichi N	Taiwan
2303	Fusarium oxysporum	cubense	A	V	01213	S.P. Chen	Namwa	Pisang Awak (ABB)	Chusan N	Taiwan
2304	Fusarium oxysporum	cubense	A	V	01213/16	S.P. Chen	Namwa	Pisang Awak (ABB)	Chichi E	Taiwan
2305	Fusarium spp.	/	/	/	/	S.P. Chen	Namwa	Pisang Awak (ABB)	Chichi E	Taiwan
2306	Fusarium oxysporum	cubense	A	V	01213	S.P. Chen	Pei-Chiao	Cavendish (AAA)	Pingtung N	Taiwan
2307	Fusarium oxysporum	cubense	A	V	01216	S.P. Chen	Formosana	Cavendish (AAA)	Chihju SW	Taiwan
2308	Fusarium oxysporum	cubense	A	V	01213	S.P. Chen	Formosana	Cavendish (AAA)	Chihju NE	Taiwan
2309	Fusarium oxysporum	cubense	A	V	01213	S.P. Chen	Pei-Chiao	Cavendish (AAA)	Sanlin N	Taiwan
2310	Fusarium oxysporum	cubense	A	V	01213	S.P. Chen	Pei-Chiao	Cavendish (AAA)	Sanlin N	Taiwan
2311	Fusarium oxysporum	cubense	A	V	01213	S.P. Chen	Mysore	Mysore (AAB)	Tsotsem E	Taiwan
2312	Fusarium oxysporum	cubense	A	V	01213	S.P. Chen	Mysore	Mysore (AAB)	Tsotsem NE	Taiwan
2313	Fusarium oxysporum	cubense	A	V	01213/16	S.P. Chen	Namwa	Pisang Awak (ABB)	Linne N	Taiwan
2314	Fusarium oxysporum	cubense	A	V	01213	S.P. Chen	Namwa	Pisang Awak (ABB)	Linne N	Taiwan
2315	Fusarium oxysporum	cubense	A	V	01213/16	S.P. Chen	Mysore	Mysore (AAB)	Dasu N	Taiwan
2316	Fusarium oxysporum	cubense	A	V	01213	S.P. Chen	Pei-Chiao	Cavendish (AAA)	Meilung SW	Taiwan
2317	Fusarium oxysporum	cubense	A	V	01213	S.P. Chen	Pei-Chiao	Cavendish (AAA)	Meilung W	Taiwan
2318	Fusarium oxysporum	cubense	A	V	0121	S.P. Chen	Namwa	Pisang Awak (ABB)	Kuosin E	Taiwan
2319	Fusarium oxysporum	cubense	A	V	01213	S.P. Chen	Pei-Chiao	Cavendish (AAA)	Luyei N	Taiwan
2320	Fusarium oxysporum	cubense	A	V	01213	S.P. Chen	Pei-Chiao	Cavendish (AAA)	Luyei N	Taiwan
2321	Fusarium oxysporum	cubense	A	V	01213	S.P. Chen	Mysore	Mysore (AAB)	Kuantien S	Taiwan
2322	Fusarium oxysporum	cubense	A	V	01213	S.P. Chen	Pei-Chiao	Cavendish (AAA)	Kuantien S	Taiwan
2323	Fusarium oxysporum	cubense	A	V	01213	S.P. Chen	Pei-Chiao	Cavendish (AAA)	Sinyuan S	Taiwan
2324	Fusarium oxysporum	cubense	A	V	01213	S.P. Chen	Pei-Chiao	Cavendish (AAA)	Not provided	Taiwan
2325	Fusarium oxysporum	cubense	A	V	01213	S.P. Chen	Pei-Chiao	Cavendish (AAA)	Not provided	Taiwan
2326	Fusarium oxysporum	cubense	A	V	01213	S.P. Chen	Namwa	Pisang Awak (ABB)	Not provided	Taiwan
2327	Fusarium oxysporum	cubense	A	V	01213	S.P. Chen	Pei-Chiao	Cavendish (AAA)	Taitung S	Taiwan
2328	Fusarium oxysporum	cubense	A	V	01213	S.P. Chen	Pei-Chiao	Cavendish (AAA)	Taitung S	Taiwan
2329	Fusarium oxysporum	cubense	A	V	01213	S.P. Chen	Pei-Chiao	Cavendish (AAA)	Neimen N	Taiwan
2330	Fusarium oxysporum	cubense	A	V	01213	S.P. Chen	Tai-Chiao #2	Cavendish (AAA)	Chusan W	Taiwan
2331	Fusarium oxysporum	cubense	A	V	01213/16	S.P. Chen	Pei-Chiao	Cavendish (AAA)	Kuantien S	Taiwan
2332	Fusarium oxysporum	cubense	A	V	01213	S.P. Chen	Pei-Chiao	Cavendish (AAA)	Luyei N	Taiwan
2333	Fusarium oxysporum	cubense	A	V	01213	S.P. Chen	Pei-Chiao	Cavendish (AAA)	Luyei N	Taiwan
2334	Fusarium oxysporum	cubense	A	V	01213	S.P. Chen	Pei-Chiao	Cavendish (AAA)	Tatung SW	Taiwan
2335	Fusarium oxysporum	cubense	A	V	01213	S.P. Chen	Pei-Chiao	Cavendish (AAA)	Chichi N	Taiwan
2336	Fusarium oxysporum	cubense	A	V	01213	S.P. Chen	Pei-Chiao	Cavendish (AAA)	Not provided	Taiwan
2337	Fusarium oxysporum	cubense	A	V	01213	S.P. Chen	Pei-Chiao	Cavendish (AAA)	Not provided	Taiwan
2338	Fusarium oxysporum	cubense	A	V	01213	S.P. Chen	Formosana	Cavendish (AAA)	Chihju SW, 9K	Taiwan
2339	Fusarium oxysporum	cubense	A	V	01213	S.P. Chen	Mysore	Mysore (AAB)	Kuantien S	Taiwan
2342	Fusarium oxysporum	cubense	A	V	01213/16	S.P. Chen	Mysore	Mysore (AAB)	Dasu N	Taiwan
2343	Fusarium oxysporum	cubense	A	V	01213	S.P. Chen	Pei-Chiao	Cavendish (AAA)	Bankan Creek	Taiwan
2344	Fusarium oxysporum	cubense	A	V	01213	S.P. Chen	Pei-Chiao	Cavendish (AAA)	Bankan Creek	Taiwan
2345	Fusarium oxysporum	cubense	A	V	01213	S.P. Chen	Pei-Chiao	Cavendish (AAA)	Nanchou E	Taiwan
2346	Fusarium oxysporum	cubense	A	V	01213	S.P. Chen	Namwa	Pisang Awak (ABB)	Chusan N	Taiwan
2347	Fusarium oxysporum	cubense	A	V	01213	S.P. Chen	Tai-Chiao #2	Cavendish (AAA)	Chusan E	Taiwan
2349	Fusarium oxysporum	cubense	A	V	01213	S.P. Chen	Pei-Chiao	Cavendish (AAA)	Luyei N	Taiwan
2350	Fusarium oxysporum	cubense	A	V	01213	S.P. Chen	Pei-Chiao	Cavendish (AAA)	Luyei N	Taiwan
2351	Fusarium oxysporum	/	/	/	Not compatible to known VCGs	S.P. Chen	Namwa	Pisang Awak (ABB)	Not provided	Taiwan
2352	Fusarium oxysporum	cubense	A	V	01213	S.P. Chen	Pei-Chiao	Cavendish (AAA)	Meilung W	Taiwan
2353	Fusarium oxysporum	cubense	A	V	01213	S.P. Chen	Pei-Chiao	Cavendish (AAA)	Chiatung SE	Taiwan
2354	Fusarium spp.	/	/	/	/	S.P. Chen	Latundan	Silk (AAB)	Henchun SW	Taiwan
2355	Fusarium oxysporum	cubense	A	V	01213	S.P. Chen	Pei-Chiao	Cavendish (AAA)	Daliao E	Taiwan
2356	Fusarium oxysporum	cubense	A	V	01213	S.P. Chen	Pei-Chiao	Cavendish (AAA)	Mingchian W	Taiwan
2357	Fusarium oxysporum	/	/	/	Not compatible to known VCGs	S.P. Chen	Pei-Chiao	Cavendish (AAA)	Mingchian W	Taiwan
2358	Fusarium oxysporum	cubense	B	VI	0124	S.P. Chen	Namwa	Pisang Awak (ABB)	Mingchian W	Taiwan
2359	Fusarium oxysporum	cubense	B	VI	0128	S.P. Chen	Namwa	Pisang Awak (ABB)	Mingchian W	Taiwan
2360	Fusarium oxysporum	cubense	A	V	01213	S.P. Chen	Formosana	Cavendish (AAA)	Chisan N	Taiwan
2361	Fusarium oxysporum	cubense	A	V	01213	S.P. Chen	Mysore	Mysore (AAB)	Sanlin E	Taiwan
2362	Fusarium oxysporum	cubense	A	V	01213	S.P. Chen	Formosana	Cavendish (AAA)	Chihju W	Taiwan
2365	Fusarium oxysporum	cubense	A	V	0121	S.P. Chen	Namwa	Pisang Awak (ABB)	Kuosin E	Taiwan
2366	Fusarium oxysporum	cubense	A	V	01213/16	S.P. Chen	Mysore	Mysore (AAB)	Yuchin S	Taiwan
2367	Fusarium oxysporum	cubense	A	V	01213	S.P. Chen	Pei-Chiao	Cavendish (AAA)	Tsaotun	Taiwan
2368	Fusarium oxysporum	cubense	A	V	01213	S.P. Chen	Pei-Chiao	Cavendish (AAA)	Kuansan S	Taiwan
2369	Fusarium oxysporum	cubense	A	V	01213	S.P. Chen	Pei-Chiao	Cavendish (AAA)	Luyei NE	Taiwan
2370	Fusarium oxysporum	cubense	A	V	01213	S.P. Chen	Pei-Chiao	Cavendish (AAA)	Luyei NE	Taiwan
2371	Fusarium oxysporum	cubense	A	V	01213	S.P. Chen	Mysore	Mysore (AAB)	Yuchin S	Taiwan
2372	Fusarium oxysporum	cubense	A	V	01213/16	S.P. Chen	Pei-Chiao	Cavendish (AAA)	Daliao SE	Taiwan
2373	Fusarium oxysporum	cubense	A	V	01213	S.P. Chen	Namwa	Pisang Awak (ABB)	Chusan W	Taiwan
2374	Fusarium oxysporum	cubense	A	V	01213	S.P. Chen	Namwa	Pisang Awak (ABB)	Chusan W	Taiwan
2375	Fusarium oxysporum	cubense	A	V	01213	S.P. Chen	Tai-Chiao #3	Cavendish (AAA)	Kukan W	Taiwan
2376	Fusarium oxysporum	cubense	A	V	01213	S.P. Chen	Tai-Chiao #3	Cavendish (AAA)	Kukan W	Taiwan
2377	Fusarium oxysporum	cubense	A	V	01213	S.P. Chen	Pei-Chiao	Cavendish (AAA)	Pingtung N	Taiwan
2378	Fusarium oxysporum	cubense	A	V	01213	S.P. Chen	Pei-Chiao	Cavendish (AAA)	Chisan N	Taiwan
2379	Fusarium oxysporum	cubense	A	V	01213	S.P. Chen	Pei-Chiao	Cavendish (AAA)	Chisan N	Taiwan
2380	Fusarium oxysporum	cubense	A	V	01213/16	S.P. Chen	Latundan	Silk (AAB)	Tsatsen S	Taiwan
2381	Fusarium oxysporum	cubense	A	V	01213	S.P. Chen	Mysore	Mysore (AAB)	Sanlin E	Taiwan
2382	Fusarium oxysporum	cubense	A	V	01213	S.P. Chen	Mysore	Mysore (AAB)	Meilung W	Taiwan
2383	Fusarium oxysporum	cubense	A	V	01213	S.P. Chen	Fornosana	Cavendish (AAA)	Chisan N	Taiwan
2384	Fusarium oxysporum	cubense	A	V	01213	S.P. Chen	Pei-Chiao	Cavendish (AAA)	Wondan N	Taiwan
2385	Fusarium oxysporum	cubense	A	V	01213	S.P. Chen	Pei-Chiao	Cavendish (AAA)	Kuantien SE	Taiwan
2386	Fusarium oxysporum	cubense	A	V	01213	S.P. Chen	Tai-Chiao #2	Cavendish (AAA)	Chusan W	Taiwan
2387	Fusarium oxysporum	cubense	A	V	01213	S.P. Chen	Pei-Chiao	Cavendish (AAA)	Daliao NE	Taiwan
2388	Fusarium oxysporum	cubense	A	V	01213	S.P. Chen	Mysore	Mysore (AAB)	Tsotsen SE	Taiwan
2389	Fusarium oxysporum	cubense	A	V	01213	S.P. Chen	Pei-Chiao	Cavendish (AAA)	Sinyuan S	Taiwan
2390	Fusarium oxysporum	cubense	A	V	01213	S.P. Chen	Mysore	Mysore (AAB)	Tsotsen SE	Taiwan
2391	Fusarium oxysporum	cubense	A	V	01213	S.P. Chen	Pei-Chiao	Cavendish (AAA)	Fanglu SE	Taiwan
2392	Fusarium oxysporum	cubense	A	V	01213/16	S.P. Chen	Mysore	Mysore (AAB)	Nanhua NE	Taiwan
2393	Fusarium oxysporum	cubense	A	V	01213	S.P. Chen	Pei-Chiao	Cavendish (AAA)	Chiatung SE	Taiwan
2394	Fusarium oxysporum	cubense	A	V	01213	S.P. Chen	Formosana	Cavendish (AAA)	Chihju NE	Taiwan
2395	Fusarium oxysporum	cubense	A	V	01213	S.P. Chen	Pei-Chiao	Cavendish (AAA)	Taitung S	Taiwan
2396	Fusarium oxysporum	cubense	A	V	01213/16	S.P. Chen	Mysore	Mysore (AAB)	Taimali N	Taiwan
2397	Fusarium oxysporum	cubense	A	V	0121	S.P. Chen	Latundan	Silk (AAB)	Tsatsen S	Taiwan
2398	Fusarium oxysporum	cubense	B	VI	0124/5	M.S. Hossain	Champa	Ney Poovan (AB)	Rangpur, Pirgonj	Bangladesh
2399	Fusarium oxysporum	cubense	B	VI	0128	M.S. Hossain	Champa	Ney Poovan (AB)	Rangpur, Pirgonj	Bangladesh
2400	Fusarium oxysporum	cubense	B	VI	01220	M.S. Hossain	Sabri	Silk (AAB)	Giabanda, Bagulagar	Bangladesh
2401	Fusarium oxysporum	cubense	B	VI	0125	M.S. Hossain	Sabri	Silk (AAB)	Pabna, Ishurdi	Bangladesh
2402	Fusarium oxysporum	cubense	B	VI	01220	M.S. Hossain	Sabri	Silk (AAB)	Pabna, Ishurdi	Bangladesh
2403	Fusarium oxysporum	cubense	B	VI	0125	M.S. Hossain	Sabri	Silk (AAB)	Pabna, Ishurdi	Bangladesh
2404	Fusarium oxysporum	cubense	B	VI	01220	M.S. Hossain	Sabri	Silk (AAB)	Rangpur, Mithapukur	Bangladesh
2405	Fusarium oxysporum	cubense	B	VI	0125	M.S. Hossain	Sabri	Silk (AAB)	Pabna, Ishurdi	Bangladesh
2406	Fusarium oxysporum	cubense	B	VI	01220	M.S. Hossain	Sabri	Silk (AAB)	Dinajpur, Kaharul	Bangladesh
2407	Fusarium oxysporum	/	/	/	Not compatible to known VCGs	M.S. Hossain	Sabri	Silk (AAB)	Pabna, Ishurdi	Bangladesh
2408	Fusarium oxysporum	cubense	B	VI	01220	M.S. Hossain	Sabri	Silk (AAB)	Rangpur, Mithapukur	Bangladesh
2409	Fusarium oxysporum	cubense	B	VI	01220	M.S. Hossain	Sabri	Silk (AAB)	Rangpur, Mithapukur	Bangladesh
2410	Fusarium oxysporum	cubense	B	VI	01220	M.S. Hossain	Sabri	Silk (AAB)	Rangpur, Mithapukur	Bangladesh
2411	Fusarium oxysporum	cubense	B	VI	0124/5	M.S. Hossain	Sabri	Silk (AAB)	Narsingdi, Shibpur	Bangladesh
2412	Fusarium oxysporum	cubense	B	VI	0124/5	M.S. Hossain	Sabri	Silk (AAB)	Dinajpur, Kaharul	Bangladesh
2413	Fusarium oxysporum	/	/	/	Not compatible to known VCGs	M.S. Hossain	Sabri	Silk (AAB)	Pabna, Ishurdi	Bangladesh
2414	Fusarium oxysporum	cubense	B	VI	0124/5	M.S. Hossain	Bangla Kola	Silk (AAB)	Rangamati, Kaptai	Bangladesh
2415	Fusarium oxysporum	cubense	B	VI	01220	M.S. Hossain	Sabri	Silk (AAB)	Dinajpur, Kaharul	Bangladesh
2416	Fusarium oxysporum	cubense	B	VI	01220	M.S. Hossain	Sabri	Silk (AAB)	Rangpur, Mithapukur	Bangladesh
2417	Fusarium oxysporum	cubense	B	VI	0124/5	M.S. Hossain	Bangla Kola	Silk (AAB)	Rangamati, Kaptai	Bangladesh
2418	Fusarium oxysporum	cubense	B	VII	0123	M.S. Hossain	Sabri	Silk (AAB)	Narsingdi, Manahardi	Bangladesh
2419	Fusarium oxysporum	cubense	B	VI	0125	M.S. Hossain	Sabri	Silk (AAB)	Gazipur, Joydebpur	Bangladesh
2420	Fusarium oxysporum	cubense	B	VI	0125	M.S. Hossain	Sabri	Silk (AAB)	Narsingdi, Manahardi	Bangladesh
2421	Fusarium oxysporum	cubense	B	VI	01222	M.S. Hossain	Sabri	Silk (AAB)	Rangpur, Mithapukur	Bangladesh
2443	Fusarium spp.	/	/	/	/	Nik Masdek	No information provided	/	Besut, Jerteh	Malaysia
2444	Fusarium oxysporum	cubense	B	VI	0125	Nik Masdek	No information provided	/	Besut, Hulm Besut	Malaysia
2445	Fusarium oxysporum	cubense	A	V	01213	Nik Masdek	Berangan	Lakatan (AAA)	Perak, Lenggong	Malaysia
2446	Fusarium oxysporum	cubense	A	V	01213/16	Nik Masdek	Mas	Sucrier (AA)	Perak, Grik	Malaysia
2447	Fusarium oxysporum	cubense	B	VII	0123	Nik Masdek	Rastah	Silk (AAB)	Perak, Lenggong	Malaysia
2448	Fusarium oxysporum	cubense	B	VII	0123	Nik Masdek	No information provided	/	Kuola Terenggamm, Manir	Malaysia
2449	Fusarium oxysporum	/	/	/	Not compatible to known VCGs	Nik Masdek	Awak	Pisang Awak (ABB)	Kuola Terenggamm, Manir	Malaysia
2450	Fusarium oxysporum	cubense	A	V	01213/16	Nik Masdek	Mas	Sucrier (AA)	Perak, Beruas	Malaysia
2451	Fusarium oxysporum	cubense	A	V	01213/16	Nik Masdek	Berangan	Lakatan (AAA)	Perak, teluk Intam	Malaysia
2452	Fusarium oxysporum	/	/	/	Self-incompatible	Nik Masdek	Pisang Abu Keling	Bluggoe (ABB)	Perak, Tapah	Malaysia
2453	Fusarium oxysporum	cubense	A	V	01213	Nik Masdek	Berangan	Lakatan (AAA)	Marang, Waleaf Tapai	Malaysia
2454	Fusarium oxysporum	cubense	B	VII	01218	Nik Masdek	Pisang Abu	Bluggoe (ABB)	Marang, Bulint Payong	Malaysia
2455	Fusarium oxysporum	cubense	A	V	01213/16	Nik Masdek	Berangan	Lakatan (AAA)	Perak, Teluk Intam	Malaysia
2456	Fusarium oxysporum	cubense	A	V	01213/16	Nik Masdek	Mas	Sucrier (AA)	Perak, Bidor	Malaysia
2457	Fusarium oxysporum	cubense	A	V	01213	Nik Masdek	Berangan	Lakatan (AAA)	Perak, Bagam Serai	Malaysia
2458	Fusarium oxysporum	cubense	A	V	01213	Nik Masdek	Pisang Abu	Bluggoe (ABB)	Perak, Chemor	Malaysia
3974	Fusarium oxysporum	cubense	A	V	01213/16	Chunyu Li	/	/	Not provided	China
3975	Fusarium oxysporum	cubense	A	V	01213/16	Chunyu Li	/	/	Not provided	China
3976	Fusarium oxysporum	cubense	A	V	01213/16	Chunyu Li	/	/	Not provided	China
3977	Fusarium oxysporum	cubense	A	V	01213/16	Chunyu Li	/	/	Not provided	China
3978	Fusarium oxysporum	cubense	A	V	01213/16	Chunyu Li	/	/	Not provided	China
3979	Fusarium oxysporum	cubense	A	V	01213/16	Chunyu Li	/	/	Not provided	China
